# Supplementary material for: One-pot synthesis of 1,3,4-oxadiazol-2(3H)-ones with CO2 as a C1 synthon promoted by hypoiodite
Source: Royal Society of Chemistry journal article supplement (doi:10.1039/c9ob01200a), 2019-01-01

## Supporting Information

### One-pot Synthesis of 1,3,4-Oxadiazol-2(3*H*)-ones with CO<sub>2</sub> as C1

#### Synthon Promoted by Hypoiodite

Na Yang, Gaoqing Yuan\*

Key Laboratory of Functional Molecular Engineering of Guangdong Province, School of  
Chemistry and Chemical Engineering, South China University of Technology

Guangzhou 510640, China

E-mail: [gqyuan@scut.edu.cn](mailto:gqyuan@scut.edu.cn)

#### List of contents

|                                |     |
|--------------------------------|-----|
| 1. General methods.....        | S2  |
| 2. Characterization data ..... | S2  |
| 3. Reference.....              | S11 |
| 4. NMR spectra .....           | S12 |

## 1. General methods

$^1\text{H}$  and  $^{13}\text{C}$  NMR spectra were recorded by using a Bruker DRX-400 spectrometer and  $\text{CDCl}_3$  as the solvent. The chemical shifts were referenced to signals at 7.26 and 77.23 ppm, respectively. Mass spectra were recorded on a Thermo Scientific ISQ gas chromatograph-mass spectrometer. The data of HRMS were obtained on a high resolution mass spectrometer (LCMS-IT-TOF). Melting points were determined with a Büchi Melting Point B-545 instrument.

## 2. Characterization data

### 3,5-diphenyl-1,3,4-oxadiazol-2(3H)-one (3a)<sup>1</sup>

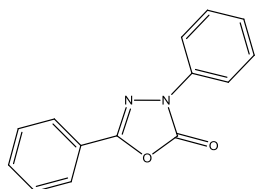

White solid, mp 108–110 °C;  $^1\text{H NMR}$  (400 MHz,  $\text{CDCl}_3$ ):  $\delta$  (ppm) 7.95 – 7.92 (m, 4H), 7.53 – 7.44 (m, 5H), 7.27 (t,  $J = 7.4$  Hz, 1H);  $^{13}\text{C NMR}$  (100 MHz,  $\text{CDCl}_3$ ):  $\delta$  (ppm) 153.7, 150.8, 136.2, 132.1, 129.4, 129.2, 126.3, 126.1, 123.6, 118.5.

### 5-(4-fluorophenyl)-3-phenyl-1,3,4-oxadiazol-2(3H)-one (3b)<sup>1</sup>

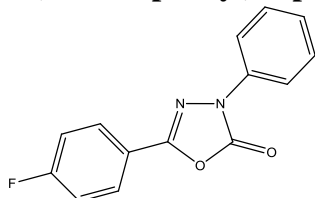

White solid, mp 142–144 °C;  $^1\text{H NMR}$  (400 MHz,  $\text{CDCl}_3$ ):  $\delta$ (ppm) 7.94 (t,  $J = 9.5$  Hz, 4H), 7.47 (t,  $J = 7.8$  Hz, 2H), 7.28 (t,  $J = 8.5$  Hz, 1H), 7.20 (t,  $J = 8.4$  Hz, 2H);  $^{13}\text{C NMR}$  (100 MHz,  $\text{CDCl}_3$ ):  $\delta$ (ppm) 165.1 (d,  $J = 252.2$  Hz), 153.0, 150.8, 136.2, 129.4, 128.5 (d,  $J = 8.9$  Hz), 126.4, 120.0 (d,  $J = 3.3$  Hz), 118.5, 116.7 (d,  $J = 22.3$  Hz).

### 5-(4-chlorophenyl)-3-phenyl-1,3,4-oxadiazol-2(3H)-one (3c)<sup>1</sup>

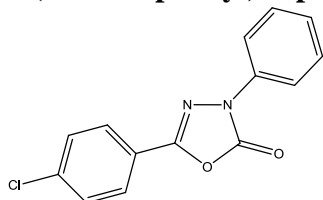

White solid, mp 133–135 °C;  $^1\text{H NMR}$  (400 MHz,  $\text{CDCl}_3$ ):  $\delta$  (ppm) 7.92 (d,  $J = 8.1$  Hz, 2H), 7.88 (d,  $J = 8.2$  Hz, 2H), 7.47 (dd,  $J = 11.0, 8.3$  Hz, 4H), 7.28 (t,  $J = 7.5$  Hz, 1H);  $^{13}\text{C NMR}$  (100 MHz,  $\text{CDCl}_3$ ):  $\delta$  (ppm) 153.0, 150.7, 138.5, 136.2, 129.7, 129.5, 127.4, 126.5, 122.1, 118.5.

### 5-(4-bromophenyl)-3-phenyl-1,3,4-oxadiazol-2(3H)-one (3d)<sup>1</sup>

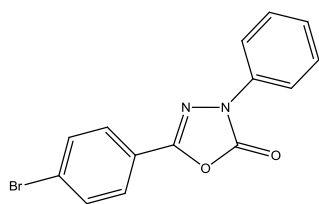

White solid, mp 121–123 °C;  $^1\text{H NMR}$  (400 MHz,  $\text{CDCl}_3$ ):  $\delta$  (ppm) 7.91 (d,  $J = 8.0$  Hz, 2H), 7.78 (d,  $J = 8.5$  Hz, 2H), 7.63 (d,  $J = 8.5$  Hz, 2H), 7.45 (t,  $J = 8.0$  Hz, 2H), 7.27 (t,  $J = 7.5$  Hz, 1H);  $^{13}\text{C NMR}$  (100 MHz,  $\text{CDCl}_3$ ):  $\delta$  (ppm) 153.0, 150.6, 136.1, 132.6, 129.4, 127.5, 126.9, 126.5, 122.6, 118.5.

### 3-phenyl-5-(*p*-tolyl)-1,3,4-oxadiazol-2(3*H*)-one (3e)<sup>1</sup>

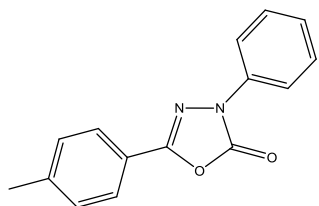

White solid, mp 148–150 °C;  $^1\text{H NMR}$  (400 MHz,  $\text{CDCl}_3$ ):  $\delta$  (ppm) 7.94 (d,  $J = 8.2$  Hz, 2H), 7.82 (d,  $J = 8.1$  Hz, 2H), 7.46 (t,  $J = 7.9$  Hz, 2H), 7.29 (t,  $J = 8.0$  Hz, 3H), 2.42 (s, 3H);  $^{13}\text{C NMR}$  (100 MHz,  $\text{CDCl}_3$ ):  $\delta$  (ppm) 154.0, 151.0, 142.8, 136.3, 130.0, 129.4, 126.2, 126.1, 120.9, 118.5, 21.9.

### 5-(4-ethylphenyl)-3-phenyl-1,3,4-oxadiazol-2(3*H*)-one (3f)<sup>1</sup>

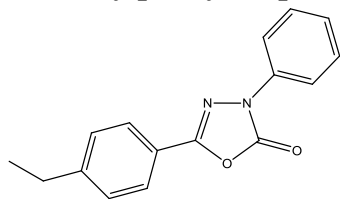

White solid, mp 72–74 °C;  $^1\text{H NMR}$  (400 MHz,  $\text{CDCl}_3$ ):  $\delta$  (ppm) 7.94 – 7.92 (m, 2H), 7.84 – 7.81 (m, 2H), 7.46 – 7.42 (m, 2H), 7.31 – 7.22 (m, 3H), 2.69 (q,  $J = 7.6$  Hz, 2H), 1.25 (t,  $J = 7.6$  Hz, 3H);  $^{13}\text{C NMR}$  (100 MHz,  $\text{CDCl}_3$ ):  $\delta$  (ppm) 153.9, 150.9, 149.0, 136.3, 129.3, 128.7, 126.2, 126.2, 121.0, 118.4, 29.1, 15.3.

### 5-(4-methoxyphenyl)-3-phenyl-1,3,4-oxadiazol-2(3*H*)-one (3g)<sup>1</sup>

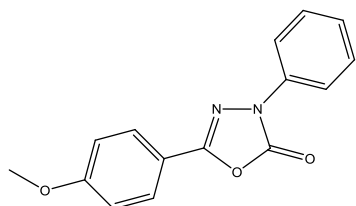

White solid, mp 144–146 °C;  $^1\text{H NMR}$  (400 MHz,  $\text{CDCl}_3$ ):  $\delta$  (ppm) 7.93 (d,  $J = 8.1$  Hz, 2H), 7.86 (d,  $J = 8.5$  Hz, 2H), 7.45 (t,  $J = 7.8$  Hz, 2H), 7.26 (t,  $J = 7.4$  Hz, 1H), 6.99 (d,  $J = 8.5$  Hz, 2H), 3.86 (s, 3H);  $^{13}\text{C NMR}$  (100 MHz,  $\text{CDCl}_3$ ):  $\delta$  (ppm) 162.7, 153.8, 151.0, 136.4, 129.3, 128.0, 126.1, 118.4, 116.0, 114.7, 55.7.

### 5-(3-fluorophenyl)-3-phenyl-1,3,4-oxadiazol-2(3*H*)-one (3h)

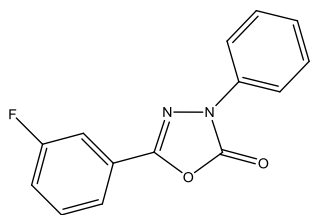

Brown solid, mp 80–82 °C;  $^1\text{H NMR}$  (400 MHz,  $\text{CDCl}_3$ ):  $\delta$  (ppm) 7.89 (d,  $J = 8.2$  Hz, 2H), 7.68 (d,  $J = 7.7$  Hz, 1H), 7.58 (d,  $J = 9.0$  Hz, 1H), 7.44 (dd,  $J = 16.3, 8.2$  Hz, 3H), 7.22 (dt,  $J = 16.8, 7.8$  Hz, 2H);  $^{13}\text{C NMR}$  (100 MHz,  $\text{CDCl}_3$ ):  $\delta$  (ppm) 162.9 (d,  $J = 246.6$  Hz), 152.6, 150.4, 136.0, 131.0 (d,  $J = 8.2$  Hz), 129.3, 126.4, 125.5 (d,  $J = 8.6$  Hz), 121.8 (d,  $J = 3.1$  Hz), 119.1 (d,  $J = 21.1$  Hz), 118.3, 113.1 (d,  $J = 24.4$  Hz); **HRMS** (ESI)  $m/z$ : calcd for  $\text{C}_{14}\text{H}_9\text{FN}_2\text{NaO}_2$   $[\text{M}+\text{Na}]^+$ , 279.0540, found 279.0544.

### 5-(3-chlorophenyl)-3-phenyl-1,3,4-oxadiazol-2(3H)-one (3i)<sup>4</sup>

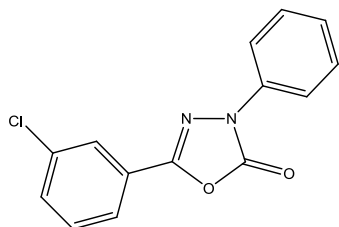

White solid, mp 115–117 °C;  $^1\text{H NMR}$  (400 MHz,  $\text{CDCl}_3$ ):  $\delta$  (ppm) 7.92 – 7.91 (m, 3H), 7.79 (d,  $J = 7.6$  Hz, 1H), 7.46 (dq,  $J = 11.7, 8.1$  Hz, 4H), 7.28 (d,  $J = 7.4$  Hz, 1H);  $^{13}\text{C NMR}$  (100 MHz,  $\text{CDCl}_3$ ):  $\delta$  (ppm) 152.5, 150.5, 136.1, 135.5, 132.2, 130.6, 129.4, 126.5, 126.1, 125.3, 124.2, 118.5.

### 5-(3-bromophenyl)-3-phenyl-1,3,4-oxadiazol-2(3H)-one (3j)

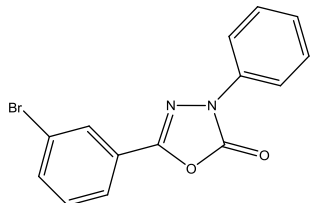

White solid, mp 88–90 °C;  $^1\text{H NMR}$  (400 MHz,  $\text{CDCl}_3$ ):  $\delta$  (ppm) 8.02 (s, 1H), 7.89 (d,  $J = 8.1$  Hz, 2H), 7.79 (d,  $J = 7.8$  Hz, 1H), 7.61 (d,  $J = 8.0$  Hz, 1H), 7.43 (t,  $J = 7.9$  Hz, 2H), 7.32 (t,  $J = 7.9$  Hz, 1H), 7.25 (t,  $J = 7.4$  Hz, 1H);  $^{13}\text{C NMR}$  (100 MHz,  $\text{CDCl}_3$ ):  $\delta$  (ppm) 152.2, 150.4, 136.0, 135.0, 130.7, 129.3, 128.9, 126.4, 125.4, 124.5, 123.2, 118.3; **HRMS** (ESI)  $m/z$ : calcd for  $\text{C}_{14}\text{H}_9\text{BrN}_2\text{NaO}_2$   $[\text{M}+\text{Na}]^+$ , 338.9740, found 338.9742.

### 3-phenyl-5-(*m*-tolyl)-1,3,4-oxadiazol-2(3H)-one(3k)<sup>1</sup>

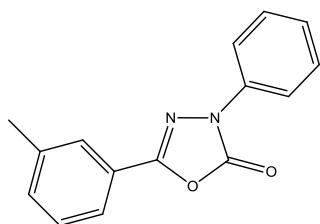

White solid, mp 123–125 °C;  $^1\text{H NMR}$  (400 MHz,  $\text{CDCl}_3$ ):  $\delta$  (ppm) 7.94 (d,  $J = 8.2$  Hz, 2H), 7.75 – 7.72 (m, 2H), 7.46 (t,  $J = 7.8$  Hz, 2H), 7.38 – 7.33 (m, 2H), 7.29 –

7.25 (m, 1H), 2.42 (s, 3H);  $^{13}\text{C}$  NMR (100 MHz,  $\text{CDCl}_3$ ):  $\delta$  (ppm) 153.9, 150.9, 139.2, 136.3, 133.0, 129.4, 129.1, 126.6, 126.3, 123.5, 123.4, 118.5, 21.5

### 5-(2-chlorophenyl)-3-phenyl-1,3,4-oxadiazol-2(3H)-one (3l)<sup>2</sup>

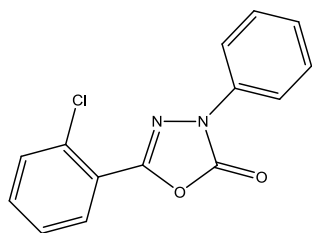

White solid, mp 116–118 °C;  $^1\text{H}$  NMR (400 MHz,  $\text{CDCl}_3$ ):  $\delta$  (ppm) 7.95 (d,  $J = 8.1$  Hz, 2H), 7.88 (d,  $J = 7.7$  Hz, 1H), 7.54 (d,  $J = 7.9$  Hz, 1H), 7.46 (t,  $J = 5.8$  Hz, 3H), 7.41 – 7.38 (m, 1H), 7.28 (t,  $J = 7.7$  Hz, 1H);  $^{13}\text{C}$  NMR (100 MHz,  $\text{CDCl}_3$ ):  $\delta$  (ppm) 151.8, 150.4, 136.1, 133.1, 132.6, 131.7, 130.2, 129.4, 127.2, 126.4, 122.4, 118.5.

### 3-phenyl-5-(*o*-tolyl)-1,3,4-oxadiazol-2(3H)-one (3m)<sup>2</sup>

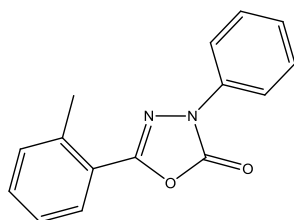

White solid, mp 96–98 °C;  $^1\text{H}$  NMR (400 MHz,  $\text{CDCl}_3$ ):  $\delta$  (ppm) 7.95 (d,  $J = 8.3$  Hz, 2H), 7.87 (d,  $J = 7.9$  Hz, 1H), 7.49 – 7.40 (m, 3H), 7.34 – 7.28 (m, 3H), 2.70 (s, 3H);  $^{13}\text{C}$  NMR (100 MHz,  $\text{CDCl}_3$ ):  $\delta$  (ppm) 154.1, 150.6, 138.3, 136.4, 132.1, 131.6, 129.4, 128.4, 126.5, 126.3, 122.4, 118.4, 22.4.

### 5-(3,4-dimethylphenyl)-3-phenyl-1,3,4-oxadiazol-2(3H)-one (3n)

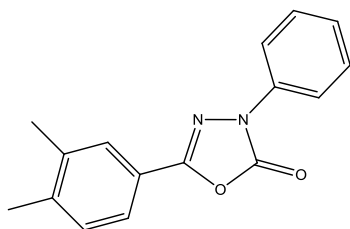

White solid, mp 119–121 °C;  $^1\text{H}$  NMR (400 MHz,  $\text{CDCl}_3$ ):  $\delta$  (ppm) 7.90 (d,  $J = 8.2$  Hz, 2H), 7.63 (s, 1H), 7.58 (d,  $J = 7.8$  Hz, 1H), 7.41 (t,  $J = 7.9$  Hz, 2H), 7.22 (t,  $J = 7.4$  Hz, 1H), 7.17 (d,  $J = 7.8$  Hz, 1H), 2.25 (d,  $J = 6.7$  Hz, 6H);  $^{13}\text{C}$  NMR (100 MHz,  $\text{CDCl}_3$ ):  $\delta$  (ppm) 153.8, 150.7, 141.4, 137.6, 136.3, 130.3, 129.2, 126.9, 126.0, 123.6, 121.0, 118.2, 20.0, 19.8; HRMS (ESI)  $m/z$ : calcd for  $\text{C}_{16}\text{H}_{14}\text{N}_2\text{NaO}_2$  [ $\text{M}+\text{Na}$ ] $^+$ , 289.0947, found 289.0951.

### 5-(2,6-dimethylphenyl)-3-phenyl-1,3,4-oxadiazol-2(3H)-one (3o)

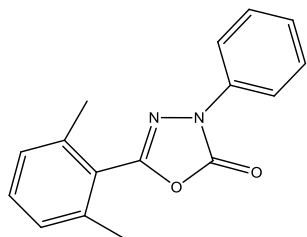

White solid, mp 79–81 °C;  $^1\text{H NMR}$  (400 MHz,  $\text{CDCl}_3$ ):  $\delta$  (ppm) 7.96 – 7.93 (m, 2H), 7.47 – 7.43 (m, 2H), 7.32 – 7.24 (m, 2H), 7.13 (d,  $J = 7.6$  Hz, 2H), 2.41 (s, 6H);  $^{13}\text{C NMR}$  (100 MHz,  $\text{CDCl}_3$ ):  $\delta$  (ppm) 153.6, 151.2, 139.1, 136.3, 131.3, 129.4, 128.4, 126.2, 123.5, 118.4, 20.6; **HRMS** (ESI)  $m/z$ : calcd for  $\text{C}_{16}\text{H}_{14}\text{N}_2\text{NaO}_2$   $[\text{M}+\text{Na}]^+$ , 289.0947, found 289.0950.

### 5-(3,4-dichlorophenyl)-3-phenyl-1,3,4-oxadiazol-2(3H)-one (3p)

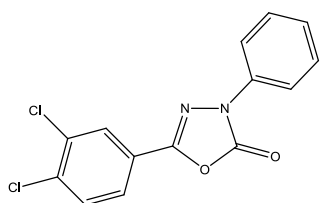

Brown solid, mp 145–147 °C;  $^1\text{H NMR}$  (400 MHz,  $\text{CDCl}_3$ ):  $\delta$  (ppm) 8.00 (d,  $J = 1.7$  Hz, 1H), 7.90 (d,  $J = 8.0$  Hz, 2H), 7.73 (dd,  $J = 8.4, 1.6$  Hz, 1H), 7.57 (d,  $J = 8.4$  Hz, 1H), 7.45 (t,  $J = 7.9$  Hz, 2H), 7.28 (t,  $J = 7.5$  Hz, 1H);  $^{13}\text{C NMR}$  (100 MHz,  $\text{CDCl}_3$ ):  $\delta$  (ppm) 151.9, 150.4, 136.7, 136.0, 134.0, 131.5, 129.5, 127.9, 126.6, 125.1, 123.4, 118.5; **HRMS** (ESI)  $m/z$ : calcd for  $\text{C}_{14}\text{H}_8\text{Cl}_2\text{N}_2\text{NaO}_2$   $[\text{M}+\text{Na}]^+$ , 328.9855, found 328.9853.

### 5-mesityl-3-phenyl-1,3,4-oxadiazol-2(3H)-one (3q)<sup>2</sup>

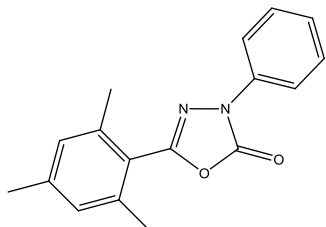

White solid, mp 62–64 °C;  $^1\text{H NMR}$  (400 MHz,  $\text{CDCl}_3$ ):  $\delta$  (ppm) 7.94 (d,  $J = 8.4$  Hz, 2H), 7.45 (t,  $J = 7.9$  Hz, 2H), 7.26 (t,  $J = 7.4$  Hz, 1H), 6.96 (s, 2H), 2.39 (s, 6H), 2.33 (s, 3H);  $^{13}\text{C NMR}$  (100 MHz,  $\text{CDCl}_3$ ):  $\delta$  (ppm) 153.9, 151.3, 141.6, 139.0, 136.4, 129.4, 129.3, 126.2, 120.7, 118.4, 21.4, 20.6.

### 3-phenyl-1,3,4-oxadiazol-2(3H)-one (3r)

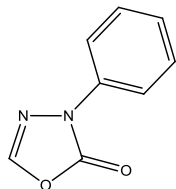

Brown solid, mp 69–71 °C;  $^1\text{H NMR}$  (400 MHz,  $\text{CDCl}_3$ ):  $\delta$  (ppm) 7.85 (d,  $J = 7.9$  Hz, 2H), 7.71 (s, 1H), 7.45 (t,  $J = 7.7$  Hz, 2H), 7.28 (t,  $J = 7.5$  Hz, 1H);  $^{13}\text{C NMR}$  (100 MHz,  $\text{CDCl}_3$ ):  $\delta$  (ppm) 150.5, 144.1, 135.9, 129.4, 126.6, 118.5; **HRMS** (ESI)  $m/z$ : calcd for  $\text{C}_8\text{H}_6\text{N}_2\text{NaO}_2$   $[\text{M}+\text{Na}]^+$ , 185.0321, found 185.0316.

### 3-phenyl-5-propyl-1,3,4-oxadiazol-2(3H)-one (3s)

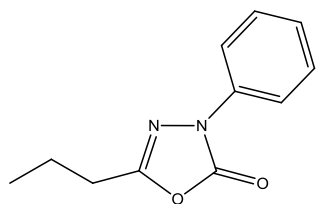

Brown solid, mp 59–61 °C;  $^1\text{H NMR}$  (400 MHz,  $\text{CDCl}_3$ ):  $\delta$  (ppm) 7.84 (d,  $J = 8.4$  Hz, 2H), 7.43 (t,  $J = 8.0$  Hz, 2H), 7.26 – 7.22 (m, 1H), 2.62 (t,  $J = 7.4$  Hz, 2H), 1.80 (dd,  $J = 14.8, 7.4$  Hz, 2H), 1.05 (t,  $J = 7.4$  Hz, 3H);  $^{13}\text{C NMR}$  (100 MHz,  $\text{CDCl}_3$ ):  $\delta$  (ppm) 157.0, 151.4, 136.3, 129.4, 126.1, 118.3, 28.4, 19.2, 13.6; **HRMS** (ESI)  $m/z$ : calcd for  $\text{C}_{11}\text{H}_{12}\text{N}_2\text{NaO}_2$   $[\text{M}+\text{Na}]^+$ , 227.0791, found 227.0793.

### 5-(*tert*-butyl)-3-phenyl-1,3,4-oxadiazol-2(3H)-one (3t)<sup>3</sup>

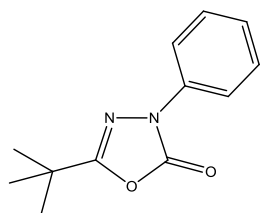

Light yellow oil;  $^1\text{H NMR}$  (400 MHz,  $\text{CDCl}_3$ ):  $\delta$  (ppm) 7.86 (d,  $J = 8.3$  Hz, 2H), 7.42 (t,  $J = 7.9$  Hz, 2H), 7.23 (t,  $J = 7.4$  Hz, 1H), 1.37 (s, 9H);  $^{13}\text{C NMR}$  (100 MHz,  $\text{CDCl}_3$ ):  $\delta$  (ppm) 162.9, 151.5, 136.3, 129.3, 126.0, 118.3, 33.0, 27.2.

### 3-(4-bromophenyl)-1,3,4-oxadiazol-2(3H)-one (3v)<sup>4</sup>

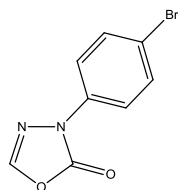

Brown solid, mp 114–116 °C;  $^1\text{H NMR}$  (400 MHz,  $\text{CDCl}_3$ ):  $\delta$  (ppm) 7.78 – 7.71 (m, 3H), 7.56 (d,  $J = 8.3$  Hz, 2H);  $^{13}\text{C NMR}$  (100 MHz,  $\text{CDCl}_3$ ):  $\delta$  (ppm) 150.1, 144.2, 135.0, 132.5, 119.9, 119.8.

### 3-(*p*-tolyl)-1,3,4-oxadiazol-2(3H)-one (3w)<sup>4</sup>

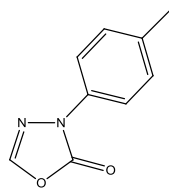

Brown solid, mp 83–85 °C;  $^1\text{H NMR}$  (400 MHz,  $\text{CDCl}_3$ ):  $\delta$  (ppm) 7.70 (d,  $J = 7.5$  Hz, 3H), 7.23 (d,  $J = 8.1$  Hz, 2H), 2.36 (s, 3H);  $^{13}\text{C NMR}$  (100 MHz,  $\text{CDCl}_3$ ):  $\delta$  (ppm) 150.5, 143.9, 136.5, 133.4, 129.9, 118.5, 21.1.

### 5-(*tert*-butyl)-3-(4-chlorophenyl)-1,3,4-oxadiazol-2(3H)-one (3x)

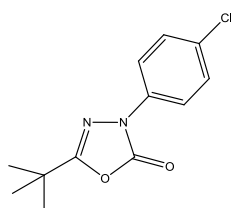

Light Yellow oil;  $^1\text{H NMR}$  (400 MHz,  $\text{CDCl}_3$ ):  $\delta$  (ppm) 7.83 (d,  $J = 8.5$  Hz,

2H), 7.39 (d,  $J = 8.6$  Hz, 2H), 1.38 (s, 9H);  $^{13}\text{C}$  NMR (100 MHz,  $\text{CDCl}_3$ ):  $\delta$  (ppm) 163.2, 151.3, 134.9, 131.4, 129.4, 119.5, 33.1, 27.2; HRMS (ESI)  $m/z$ : calcd for  $\text{C}_{12}\text{H}_{14}\text{ClN}_2\text{O}_2$   $[\text{M}+\text{H}]^+$ , 253.0738, found 253.0733.

### 3-(4-fluorophenyl)-5-phenyl-1,3,4-oxadiazol-2(3H)-one (4a)<sup>1</sup>

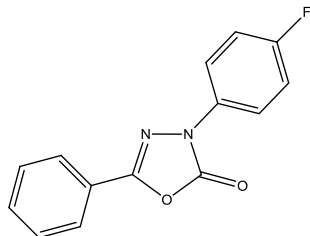

White solid, mp 145–147 °C;  $^1\text{H}$  NMR (400 MHz,  $\text{CDCl}_3$ ):  $\delta$  (ppm) 7.92 (t,  $J = 7.1$  Hz, 4H), 7.53 (dq,  $J = 14.9, 7.5$  Hz, 3H), 7.16 (t,  $J = 7.9$  Hz, 2H);  $^{13}\text{C}$  NMR (100 MHz,  $\text{CDCl}_3$ ):  $\delta$  (ppm) 160.8 (d,  $J = 244.7$  Hz), 153.9, 150.9, 132.4 (d,  $J = 2.9$  Hz), 132.3, 129.3, 126.2, 123.6, 120.4 (d,  $J = 8.1$  Hz), 116.3 (d,  $J = 22.8$  Hz).

### 3-(4-chlorophenyl)-5-phenyl-1,3,4-oxadiazol-2(3H)-one (4b)<sup>1</sup>

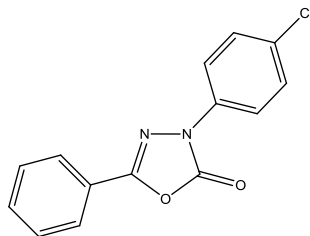

White solid, mp 141–143 °C;  $^1\text{H}$  NMR (400 MHz,  $\text{CDCl}_3$ ):  $\delta$  (ppm) 7.92 (t,  $J = 8.4$  Hz, 4H), 7.56 – 7.49 (m, 3H), 7.43 (d,  $J = 7.9$  Hz, 2H);  $^{13}\text{C}$  NMR (100 MHz,  $\text{CDCl}_3$ ):  $\delta$  (ppm) 153.9, 150.7, 134.8, 132.4, 131.7, 129.5, 129.3, 126.2, 123.4, 119.6.

### 3-(4-bromophenyl)-5-phenyl-1,3,4-oxadiazol-2(3H)-one (4c)<sup>2</sup>

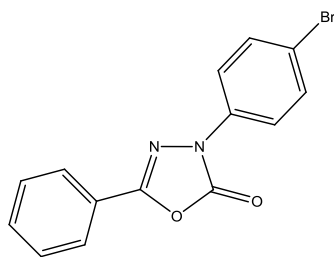

White solid, mp 132–135 °C;  $^1\text{H}$  NMR (400 MHz,  $\text{CDCl}_3$ ):  $\delta$  (ppm) 7.92 (d,  $J = 7.2$  Hz, 2H), 7.84 (d,  $J = 7.5$  Hz, 2H), 7.57 – 7.48 (m, 5H);  $^{13}\text{C}$  NMR (100 MHz,  $\text{CDCl}_3$ ):  $\delta$  (ppm) 153.9, 150.6, 135.3, 132.4, 132.3, 129.3, 126.2, 123.4, 119.9, 119.5.

### 5-phenyl-3-(*p*-tolyl)-1,3,4-oxadiazol-2(3H)-one (4d)<sup>3</sup>

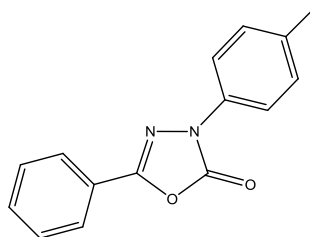

White solid, mp 155–157 °C;  $^1\text{H}$  NMR (400 MHz,  $\text{CDCl}_3$ ):  $\delta$  (ppm) 7.92 (d,  $J = 7.0$  Hz, 2H), 7.80 (d,  $J = 8.1$  Hz, 2H), 7.53 – 7.47 (m, 3H), 7.25 (d,  $J = 7.9$  Hz, 2H),



2.37 (s, 3H);  $^{13}\text{C}$  NMR (100 MHz,  $\text{CDCl}_3$ ):  $\delta$  (ppm) 153.6, 150.9, 136.2, 133.8, 132.0, 129.9, 129.2, 126.1, 123.7, 118.6, 21.1.

**3-(4-methoxyphenyl)-5-phenyl-1,3,4-oxadiazol-2(3H)-one (4e)**<sup>3</sup>

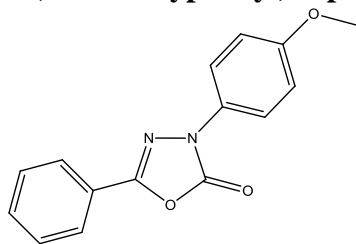

White solid, mp 135–137 °C;  $^1\text{H}$  NMR (400 MHz,  $\text{CDCl}_3$ ):  $\delta$  (ppm) 7.92 (d,  $J = 7.3$  Hz, 2H), 7.81 (d,  $J = 8.4$  Hz, 2H), 7.53 – 7.47 (m, 3H), 6.98 (d,  $J = 8.4$  Hz, 2H), 3.83 (s, 3H);  $^{13}\text{C}$  NMR (100 MHz,  $\text{CDCl}_3$ ):  $\delta$  (ppm) 158.1, 153.6, 151.1, 132.0, 129.5, 129.2, 126.1, 123.7, 120.5, 114.5, 55.7.

**3-(3-bromophenyl)-5-phenyl-1,3,4-oxadiazol-2(3H)-one (4f)**<sup>5</sup>

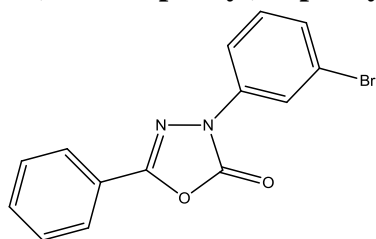

White solid, mp 128–130 °C;  $^1\text{H}$  NMR (400 MHz,  $\text{CDCl}_3$ ):  $\delta$  (ppm) 8.13 (s, 1H), 7.94 (d,  $J = 7.7$  Hz, 3H), 7.58 – 7.49 (m, 3H), 7.40 (d,  $J = 7.8$  Hz, 1H), 7.32 (t,  $J = 7.9$  Hz, 1H);  $^{13}\text{C}$  NMR (100 MHz,  $\text{CDCl}_3$ ):  $\delta$  (ppm) 154.0, 150.5, 137.3, 132.4, 130.7, 129.3, 129.3, 126.3, 123.4, 123.1, 121.3, 116.7.

**5-phenyl-3-(*m*-tolyl)-1,3,4-oxadiazol-2(3H)-one (4g)**<sup>5</sup>

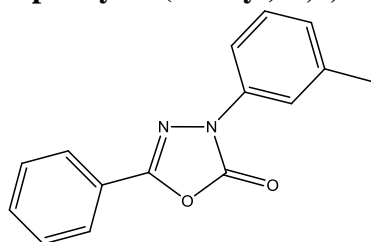

Brown solid, mp 99–101 °C;  $^1\text{H}$  NMR (400 MHz,  $\text{CDCl}_3$ ):  $\delta$  (ppm) 7.95 (d,  $J = 7.4$  Hz, 2H), 7.75 (d,  $J = 12.5$  Hz, 2H), 7.55 – 7.49 (m, 3H), 7.35 (t,  $J = 7.8$  Hz, 1H), 7.09 (d,  $J = 7.5$  Hz, 1H), 2.43 (s, 3H);  $^{13}\text{C}$  NMR (100 MHz,  $\text{CDCl}_3$ ):  $\delta$  (ppm) 153.7, 151.0, 139.5, 136.2, 132.1, 129.2, 127.2, 126.2, 123.7, 119.2, 115.8, 21.8.

**5-phenyl-3-(*o*-tolyl)-1,3,4-oxadiazol-2(3H)-one (4h)**<sup>5</sup>

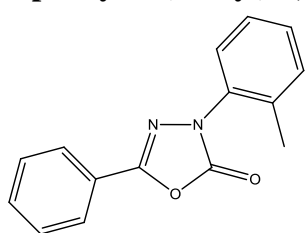

Brown solid, mp 104–106 °C;  $^1\text{H}$  NMR (400 MHz,  $\text{CDCl}_3$ ):  $\delta$  (ppm) 7.92 (d,  $J = 7.3$  Hz, 2H), 7.54 – 7.48 (m, 3H), 7.44 (d,  $J = 7.3$  Hz, 1H), 7.33 (d,  $J = 11.5$  Hz, 3H),

2.39 (s, 3H);  $^{13}\text{C}$  NMR (100 MHz,  $\text{CDCl}_3$ ):  $\delta$  (ppm) 154.2, 152.3, 135.3, 134.0, 132.0, 131.7, 129.7, 129.2, 127.1, 126.7, 126.0, 123.9, 18.3.

### 3-(2-bromophenyl)-5-phenyl-1,3,4-oxadiazol-2(3H)-one (4i)<sup>5</sup>

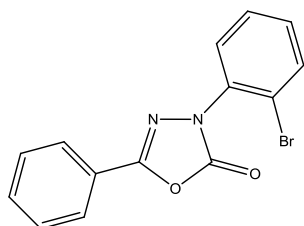

Brown solid, mp 123–125 °C;  $^1\text{H}$  NMR (400 MHz,  $\text{CDCl}_3$ ):  $\delta$  (ppm) 7.92 (d,  $J = 7.4$  Hz, 2H), 7.74 (d,  $J = 8.1$  Hz, 1H), 7.54 – 7.45 (m, 5H), 7.36 (t,  $J = 8.0$  Hz, 1H);  $^{13}\text{C}$  NMR (100 MHz,  $\text{CDCl}_3$ ):  $\delta$  (ppm) 154.4, 151.8, 134.3, 134.2, 132.2, 131.5, 129.5, 129.3, 128.7, 126.1, 123.8, 121.9.

### 3-(3,5-dimethylphenyl)-5-phenyl-1,3,4-oxadiazol-2(3H)-one (4j)<sup>5</sup>

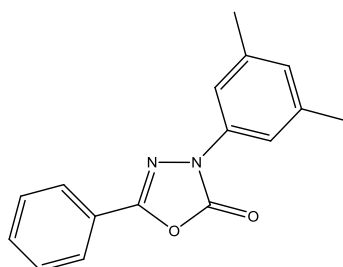

Brown oil;  $^1\text{H}$  NMR (400 MHz,  $\text{CDCl}_3$ ):  $\delta$  (ppm) 7.95 (d,  $J = 7.4$  Hz, 2H), 7.56 – 7.48 (m, 5H), 6.91 (s, 1H), 2.38 (s, 6H);  $^{13}\text{C}$  NMR (100 MHz,  $\text{CDCl}_3$ ):  $\delta$  (ppm) 153.6, 151.0, 139.3, 136.1, 132.1, 129.2, 128.2, 126.2, 123.8, 116.4, 21.7.

### 3-(tert-butyl)-5-phenyl-1,3,4-oxadiazol-2(3H)-one (4k)

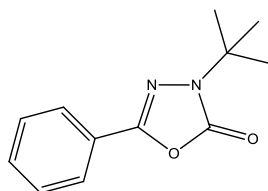

Light yellow oil;  $^1\text{H}$  NMR (400 MHz,  $\text{CDCl}_3$ ):  $\delta$  (ppm) 7.84 (s, 2H), 7.46 (s, 3H), 1.61 (d,  $J = 8.3$  Hz, 9H);  $^{13}\text{C}$  NMR (100 MHz,  $\text{CDCl}_3$ ):  $\delta$  (ppm) 152.6, 152.1, 131.3, 129.0, 125.7, 124.5, 58.5, 28.1; HRMS (ESI)  $m/z$ : calcd for  $\text{C}_{12}\text{H}_{14}\text{N}_2\text{NaO}_2$   $[\text{M}+\text{Na}]^+$ , 241.0947, found 241.0949.

### 5-(tert-butyl)-3-(2,4-dichloro-5-isopropoxyphenyl)-1,3,4-oxadiazol-2(3H)-one (5a)<sup>3</sup>

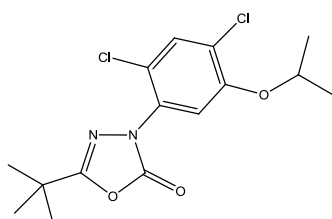

White solid, mp 84–86 °C;  $^1\text{H}$  NMR (400 MHz,  $\text{CDCl}_3$ ):  $\delta$  (ppm) 7.38 (s, 1H), 7.14 (s, 1H), 4.51 (dd,  $J = 11.4, 5.6$  Hz, 1H), 1.34 (d,  $J = 5.4$  Hz, 6H), 1.25 (s, 9H);

<sup>13</sup>C NMR (100 MHz, CDCl<sub>3</sub>): δ (ppm) 178.5, 159.0, 153.1, 140.5, 130.9, 123.0, 121.7, 114.9, 72.4, 38.0, 27.5, 21.9.

### 3. Reference

- (1) Y. Wang, X. Meng, Y. T. Yang, L. T. Zhang, S. B. Guo, D. Tang, Y.-X. Li and B. H. Chen, *Chem. Commun.*, 2015, **51**, 1905-1907.
- (2) F. H. Ji, X. W. Li, W. Guo, W. Q. Wu and H. F. Jiang, *J. Org. Chem.*, 2015, **80**, 5713-5718.
- (3) C. X. Guo, W. Z. Zhang, N. Zhang and X. B. Lu, *J. Org. Chem.* 2017, **82**, 7637-7642.
- (4) N. Yang, Q. Lai, H. F. Jiang and G. Q. Yuan, *Electrochem. Commun.* 2016, **72**, 109-112.
- (5) N. Yang, H. Zhang and G. Q. Yuan, *Org. Chem. Front.*, 2019, **6**, 532-536.

## 4. NMR spectra

3a

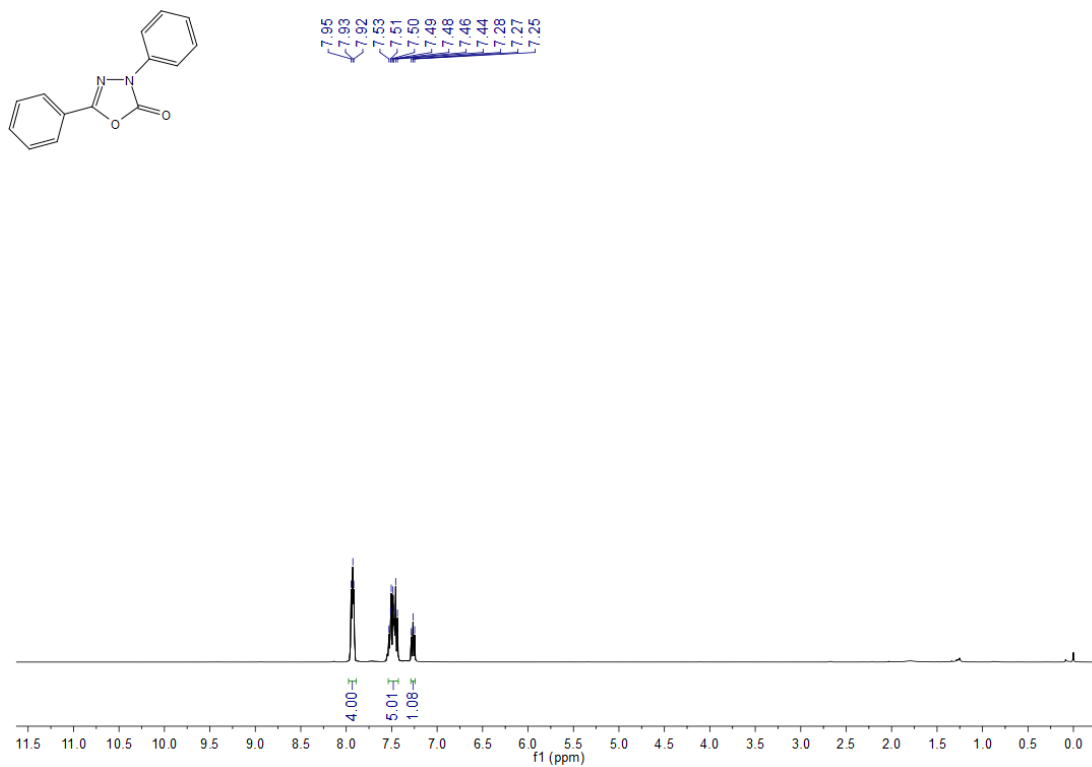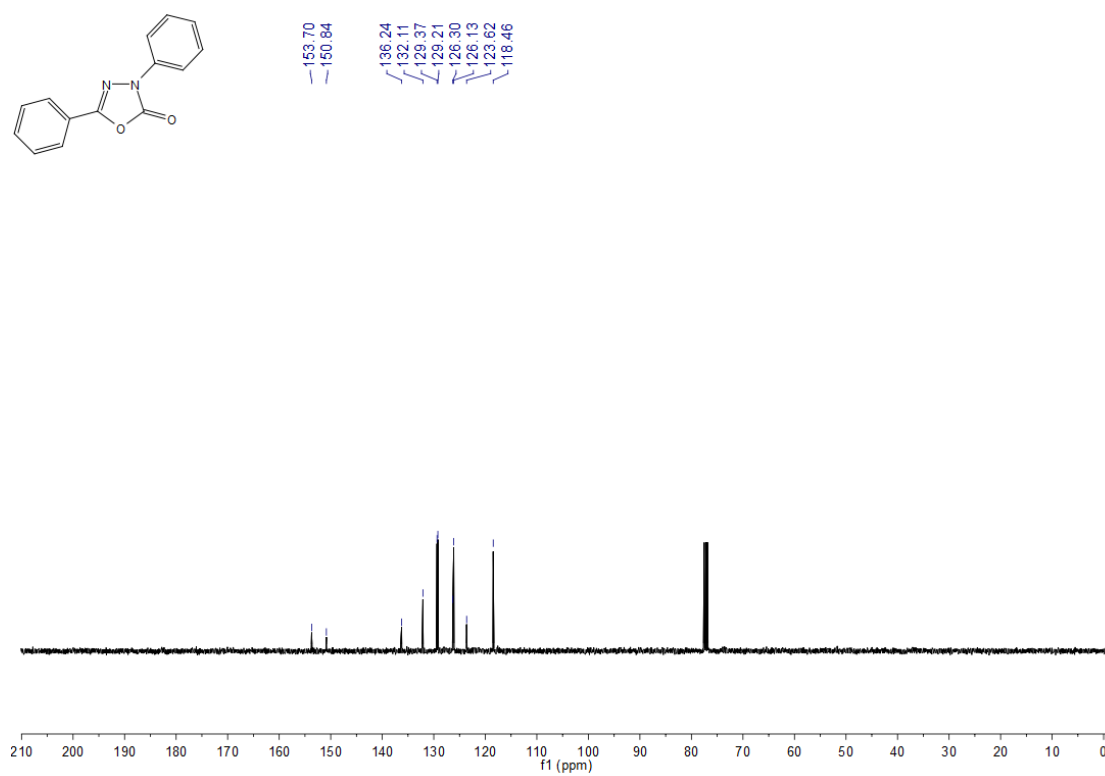

3b

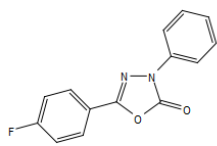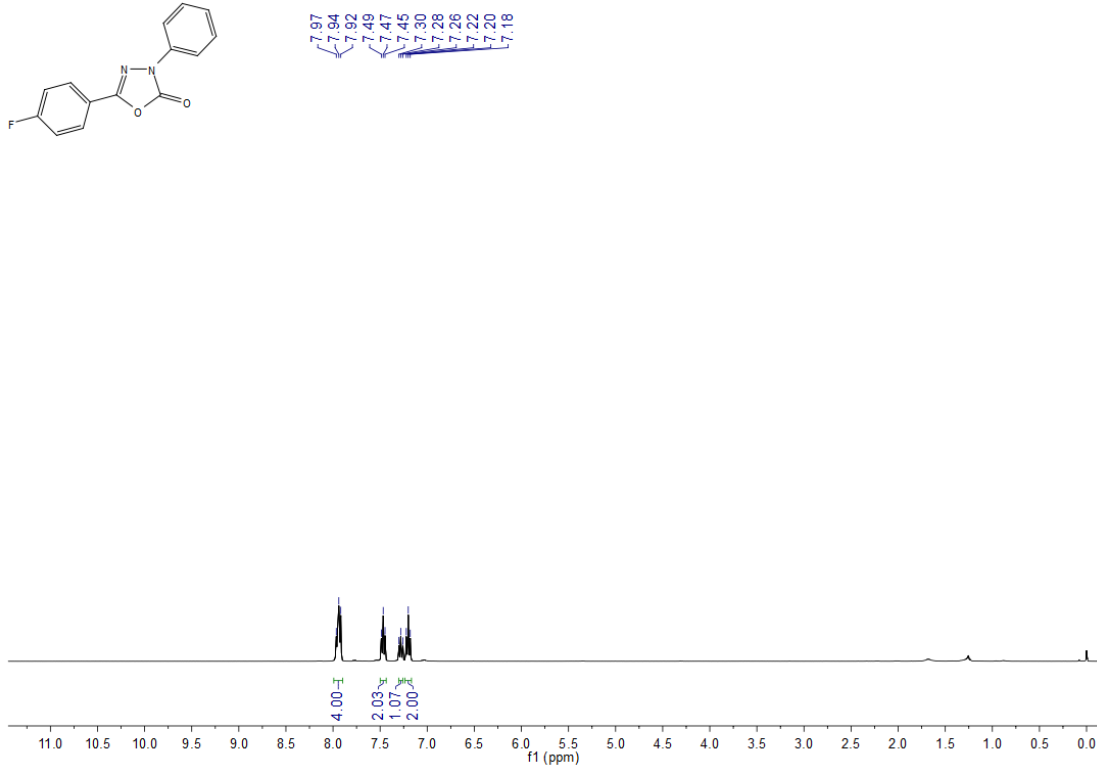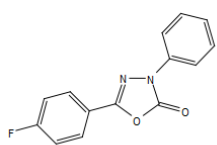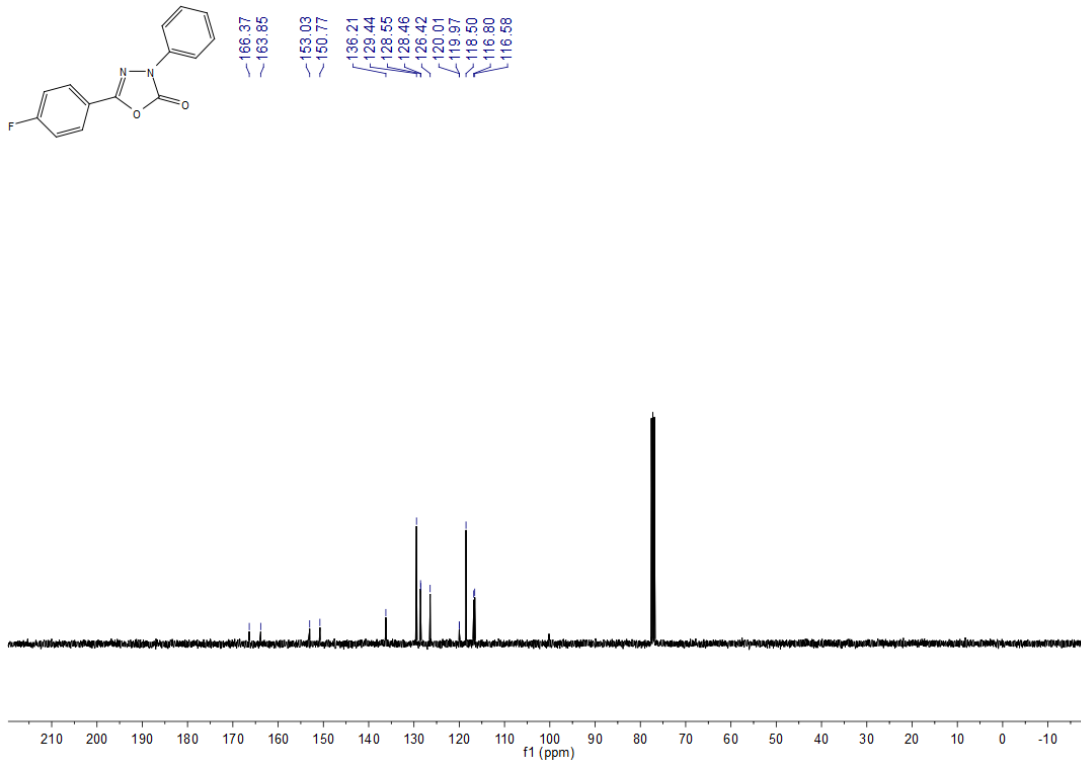

3c

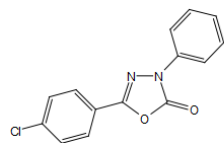

7.93  
7.91  
7.89  
7.87  
7.50  
7.47  
7.45  
7.30  
7.28  
7.27

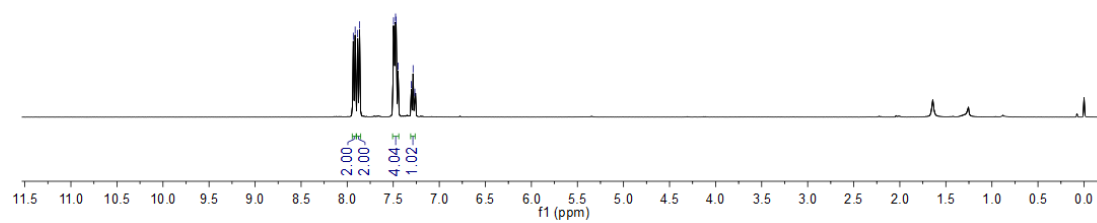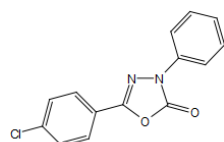

152.97  
150.68  
138.47  
136.15  
129.69  
129.45  
127.43  
126.50  
122.14  
118.52

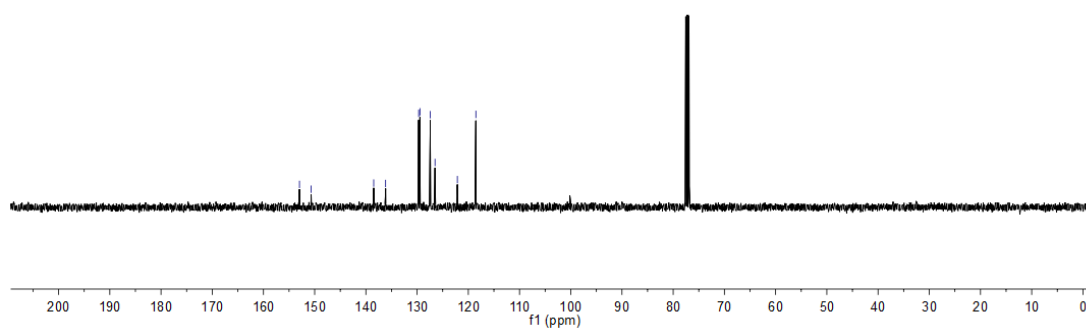

3d

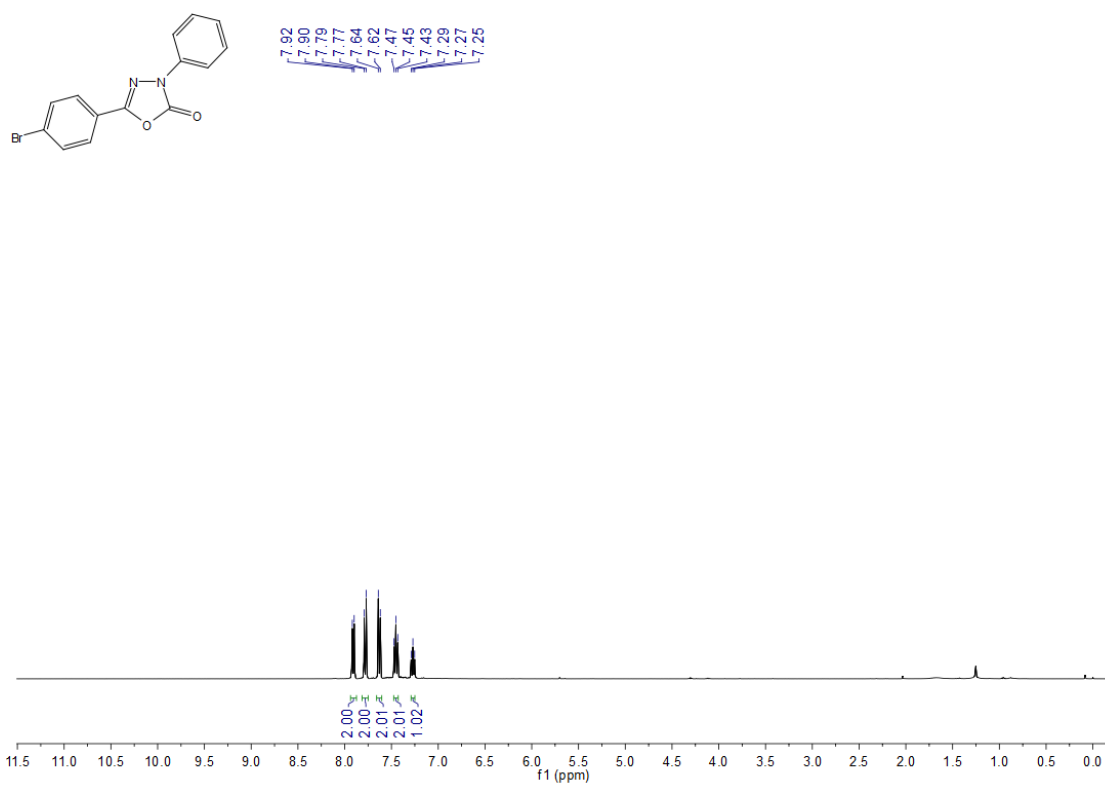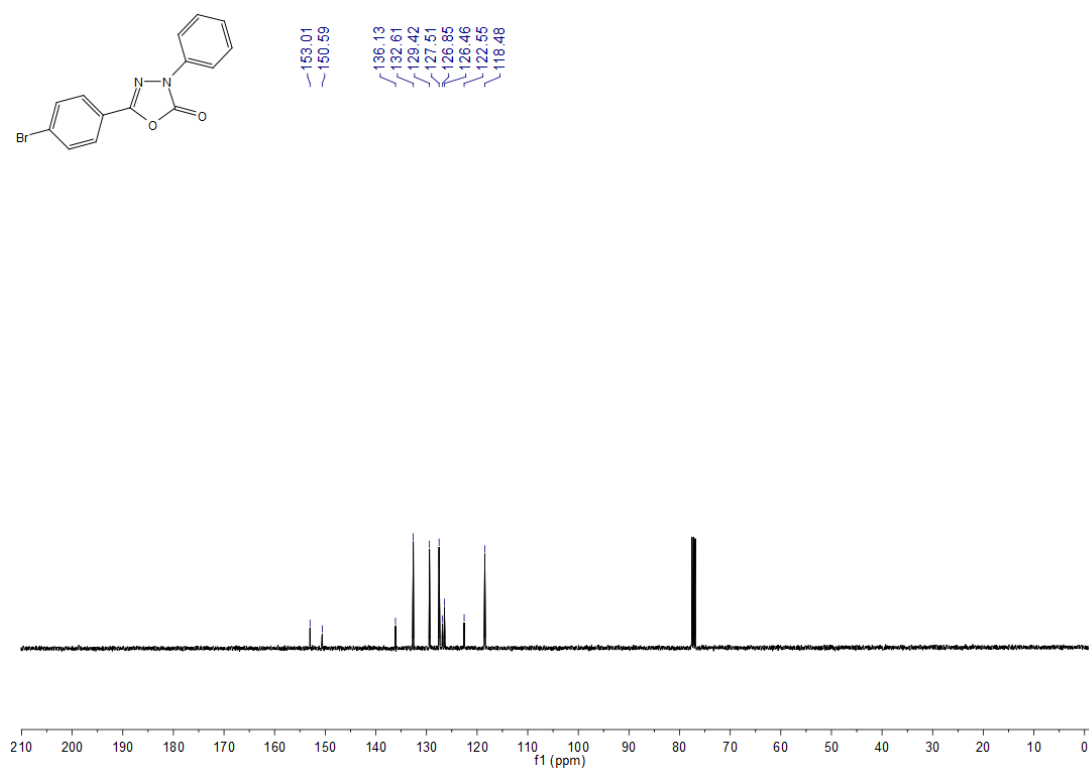

3e

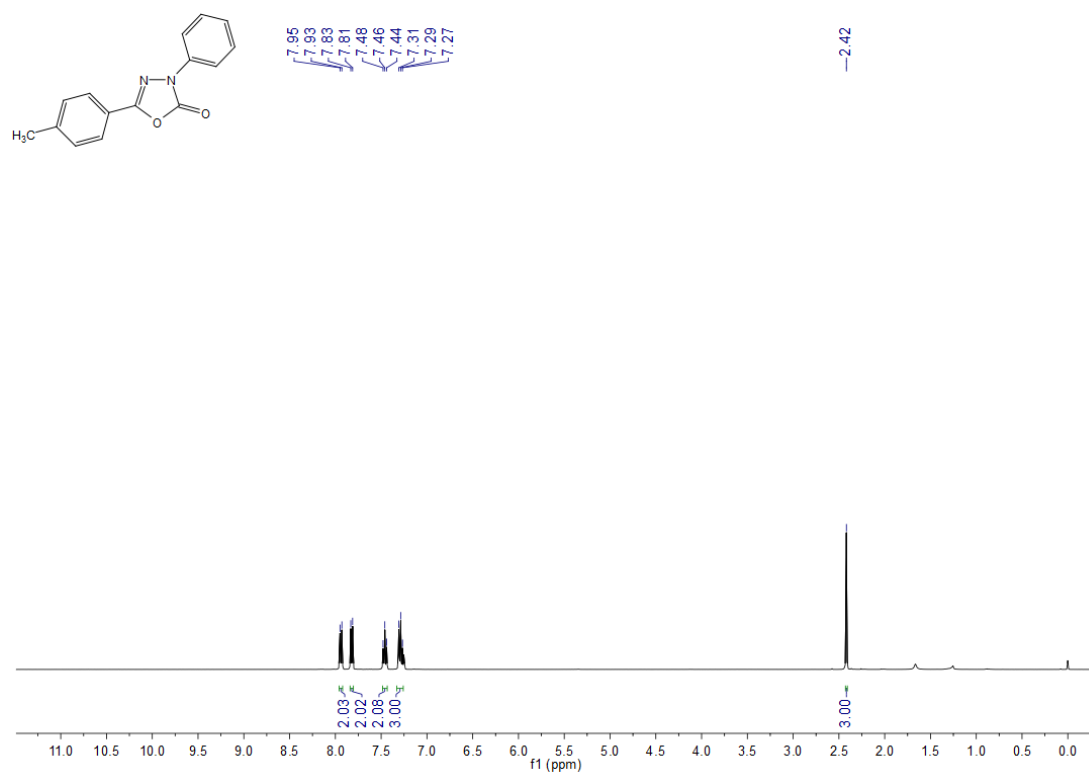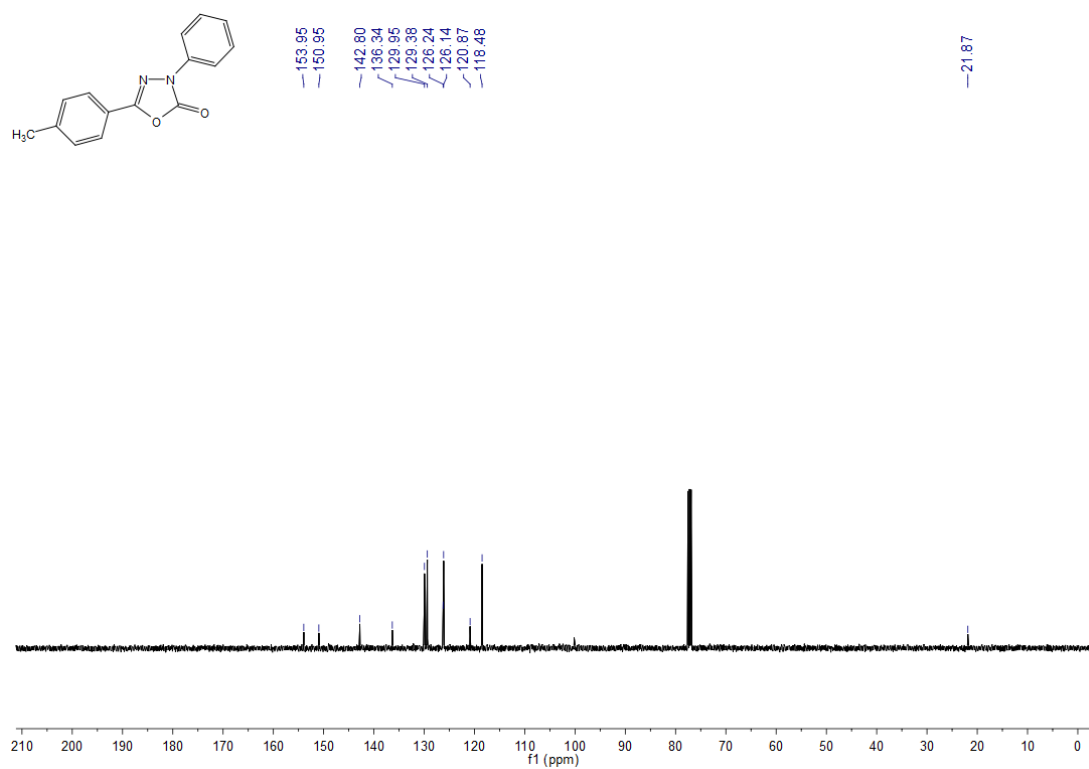



3f

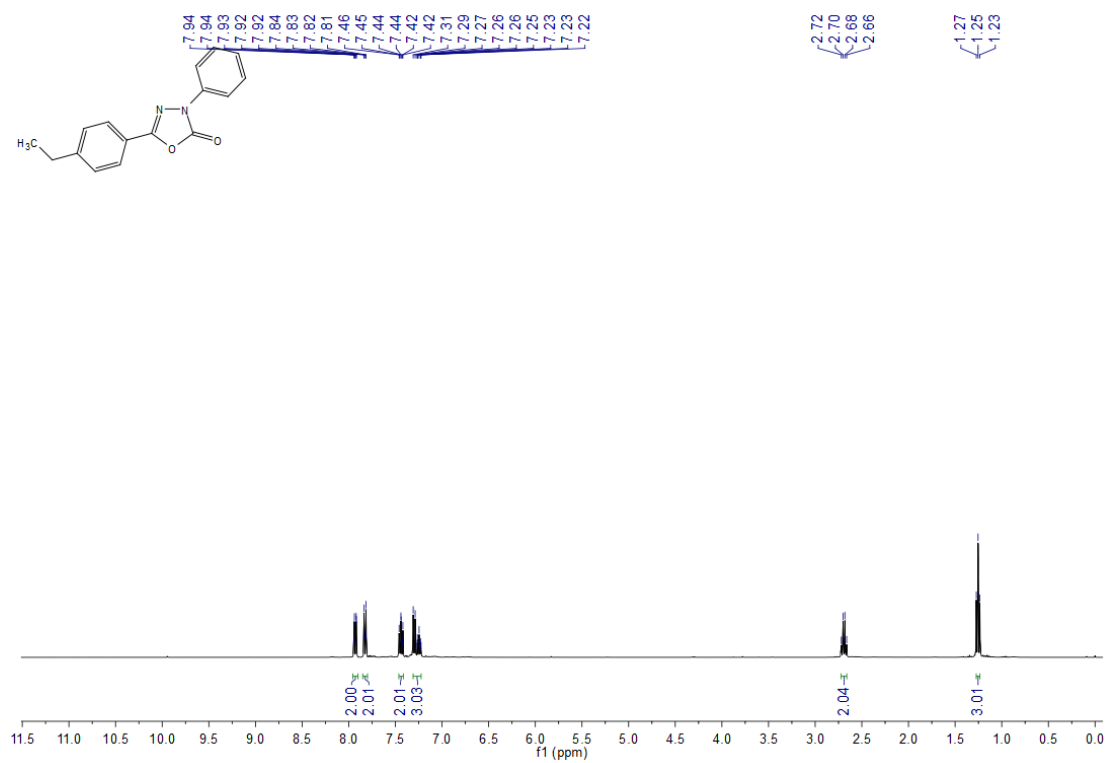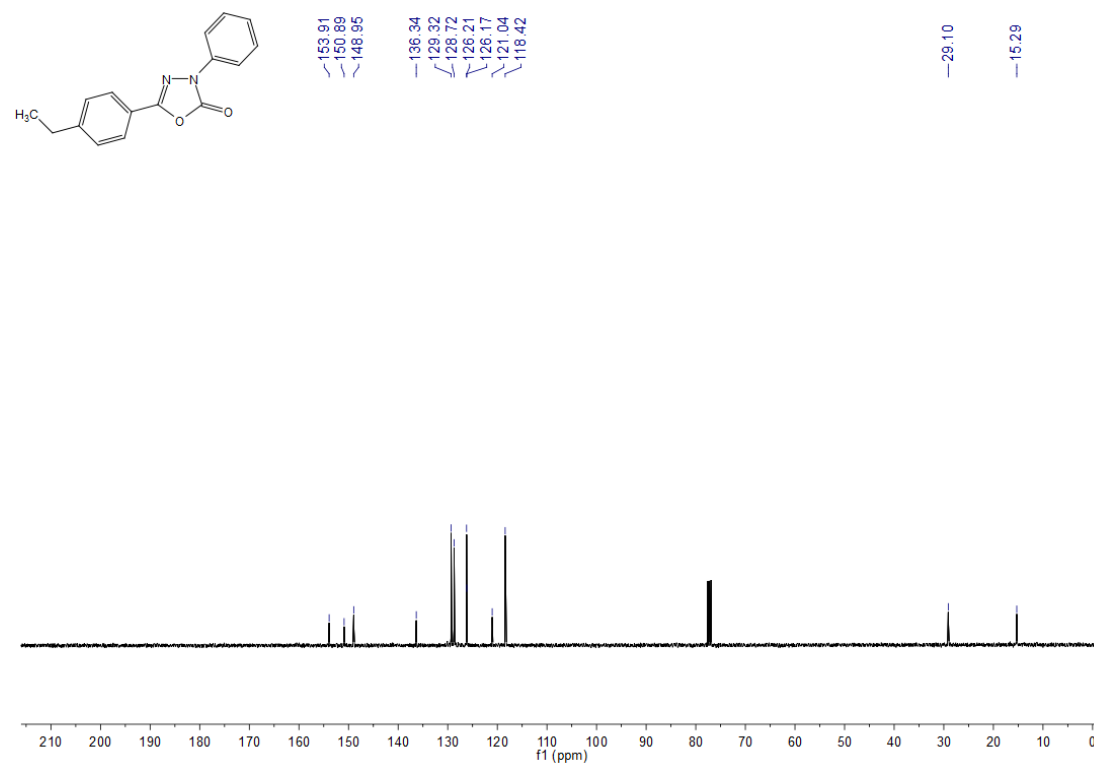

3g

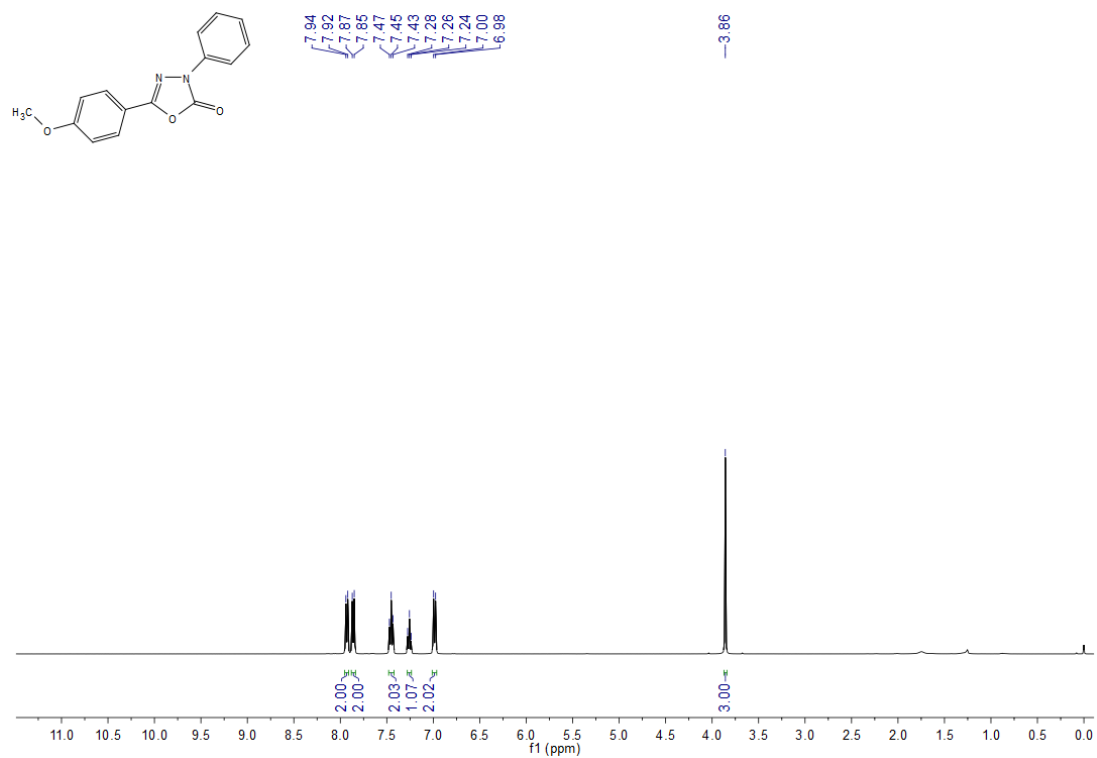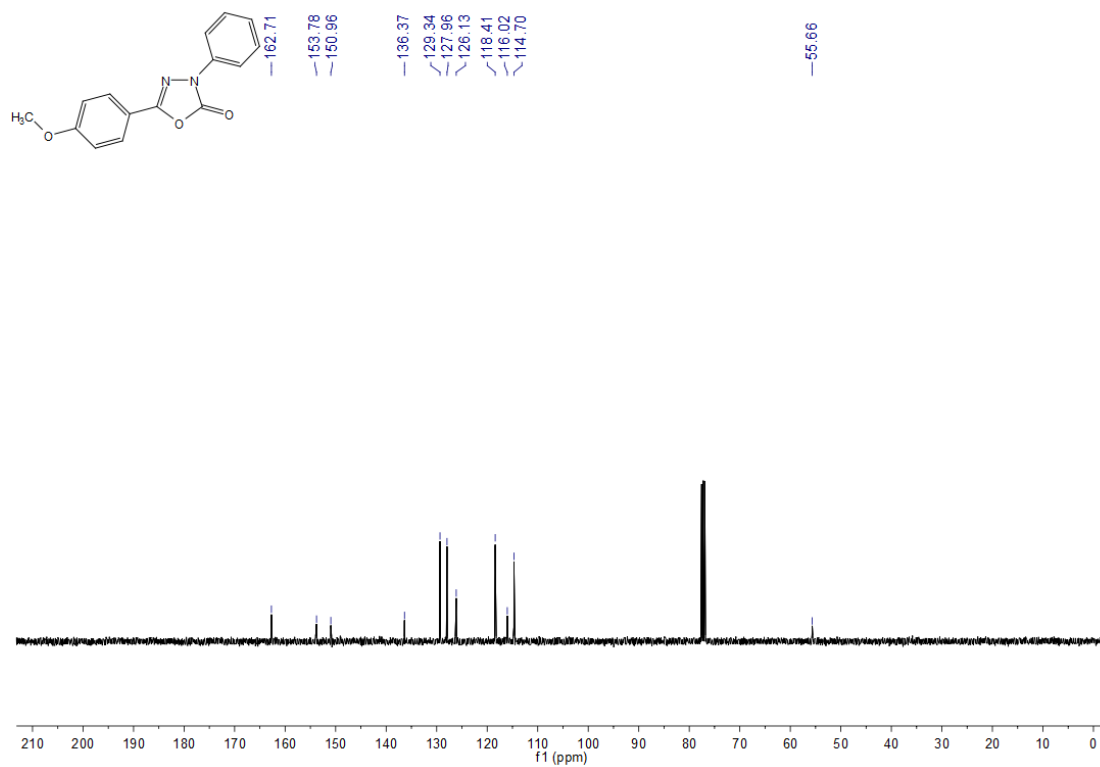

3h

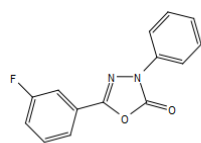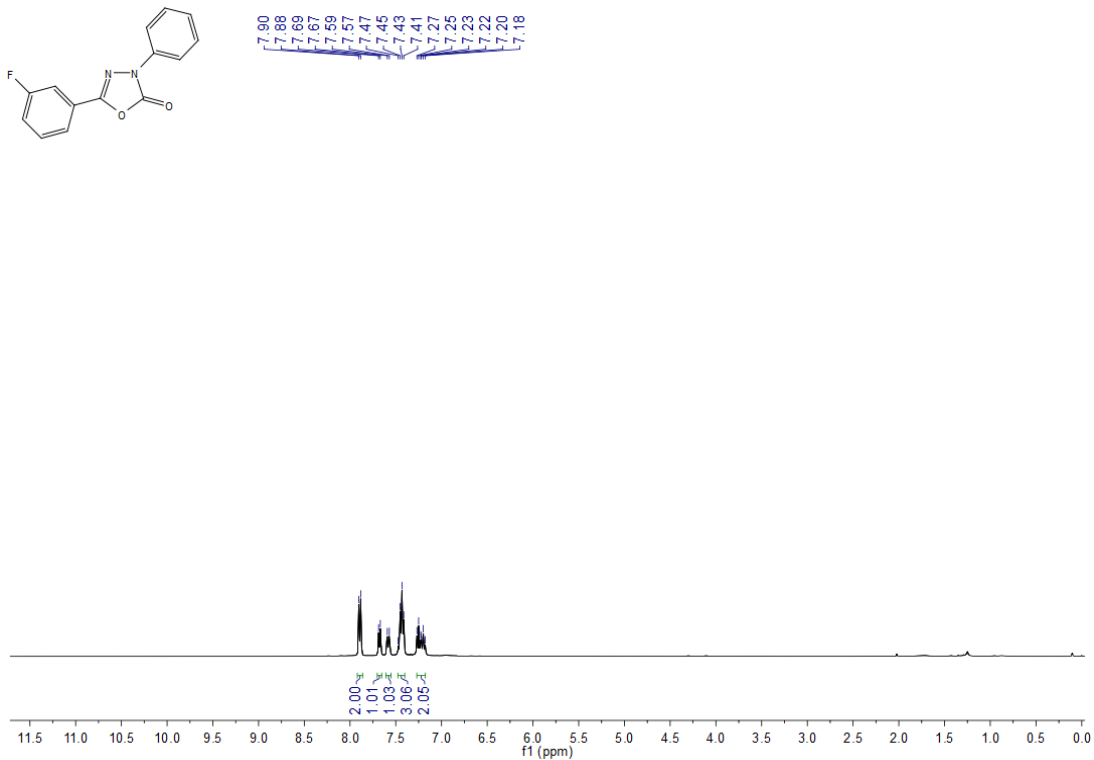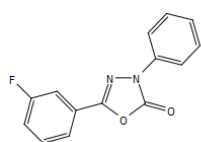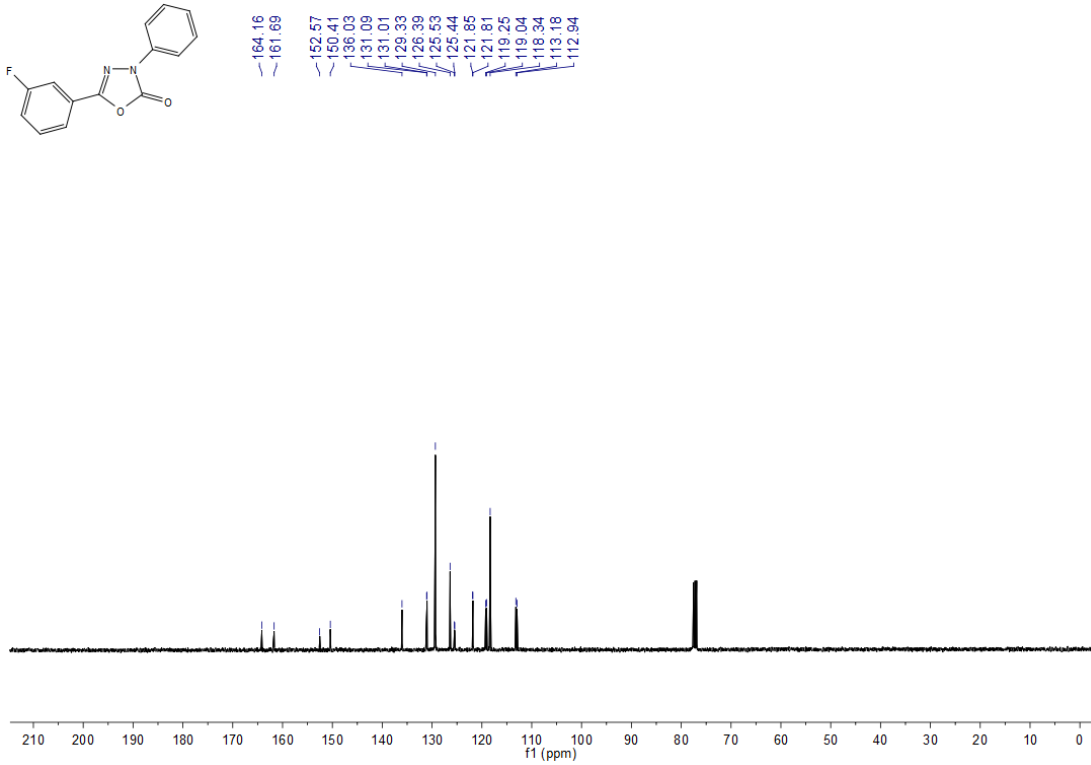

3i

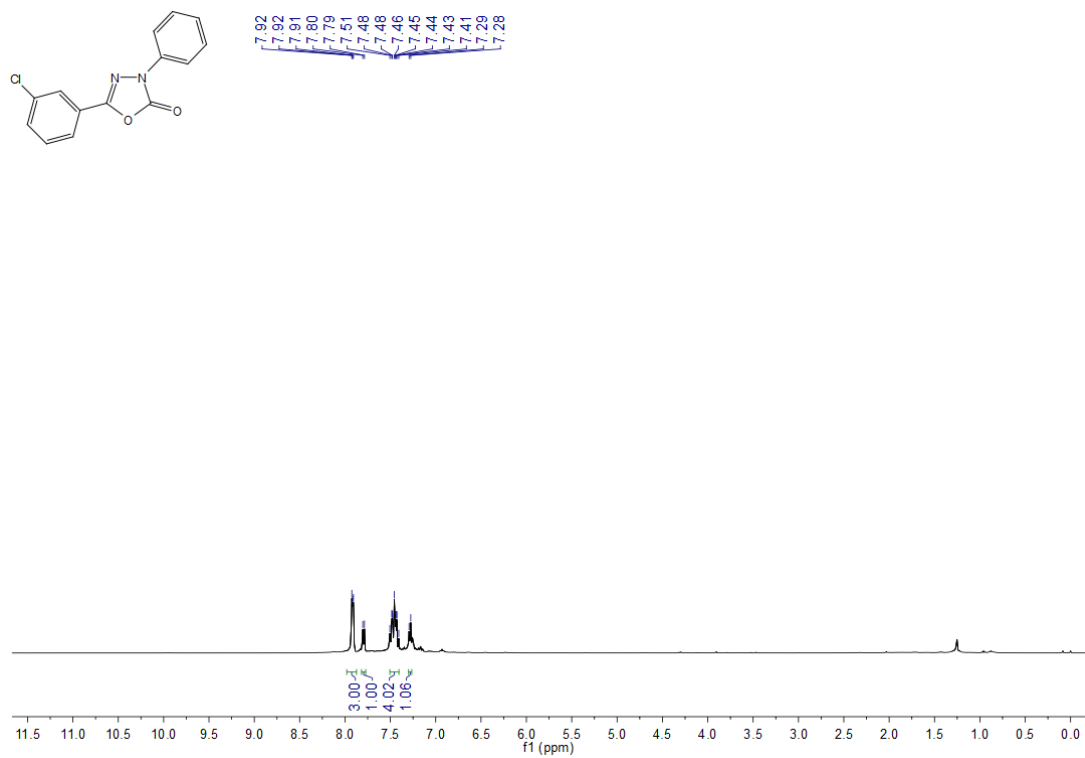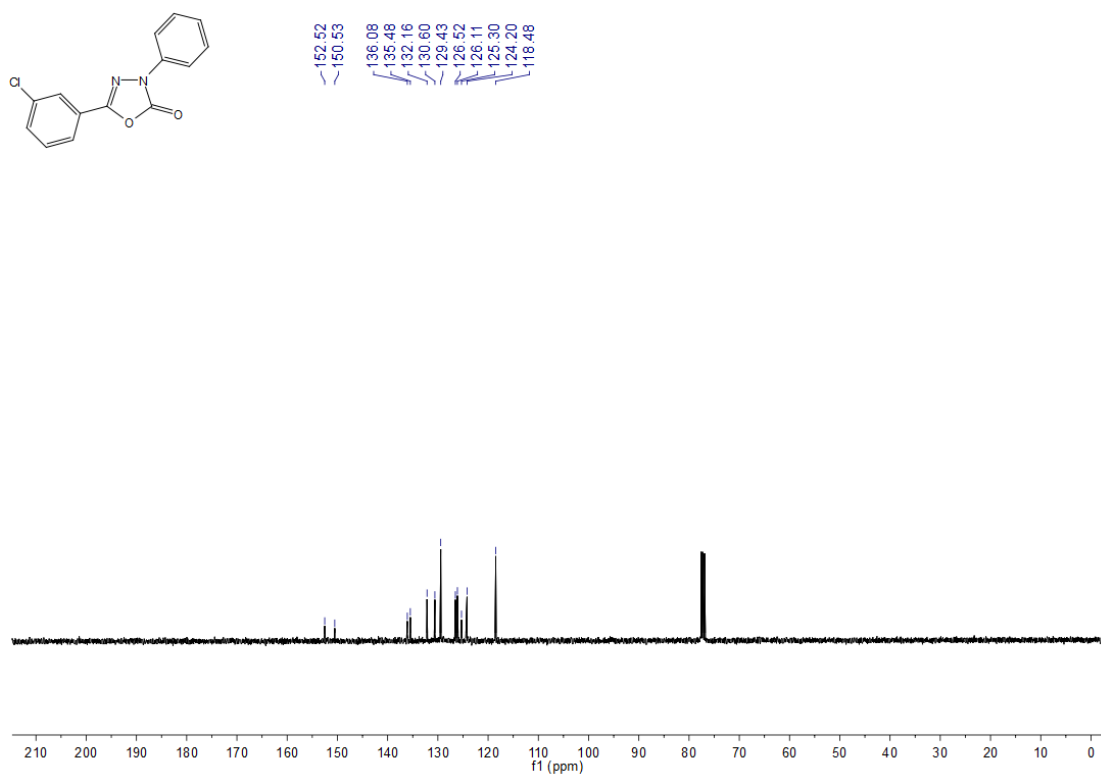

3j

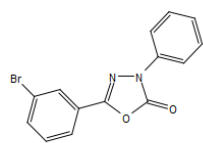

8.02  
7.90  
7.88  
7.80  
7.78  
7.62  
7.60  
7.45  
7.43  
7.41  
7.34  
7.32  
7.30  
7.27  
7.25  
7.23

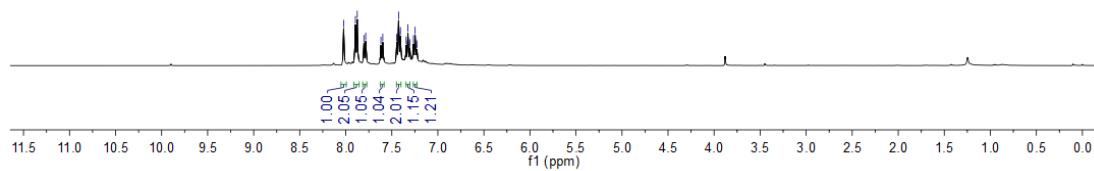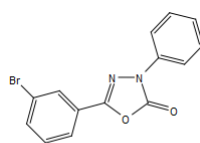

152.21  
150.35  
135.97  
134.95  
130.93  
129.88  
128.90  
125.96  
124.53  
123.23  
118.31

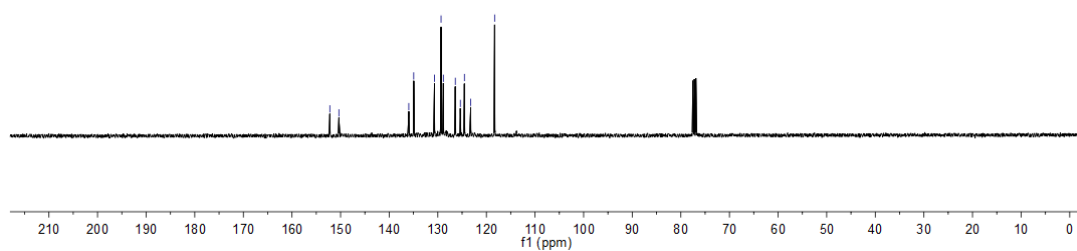

3k

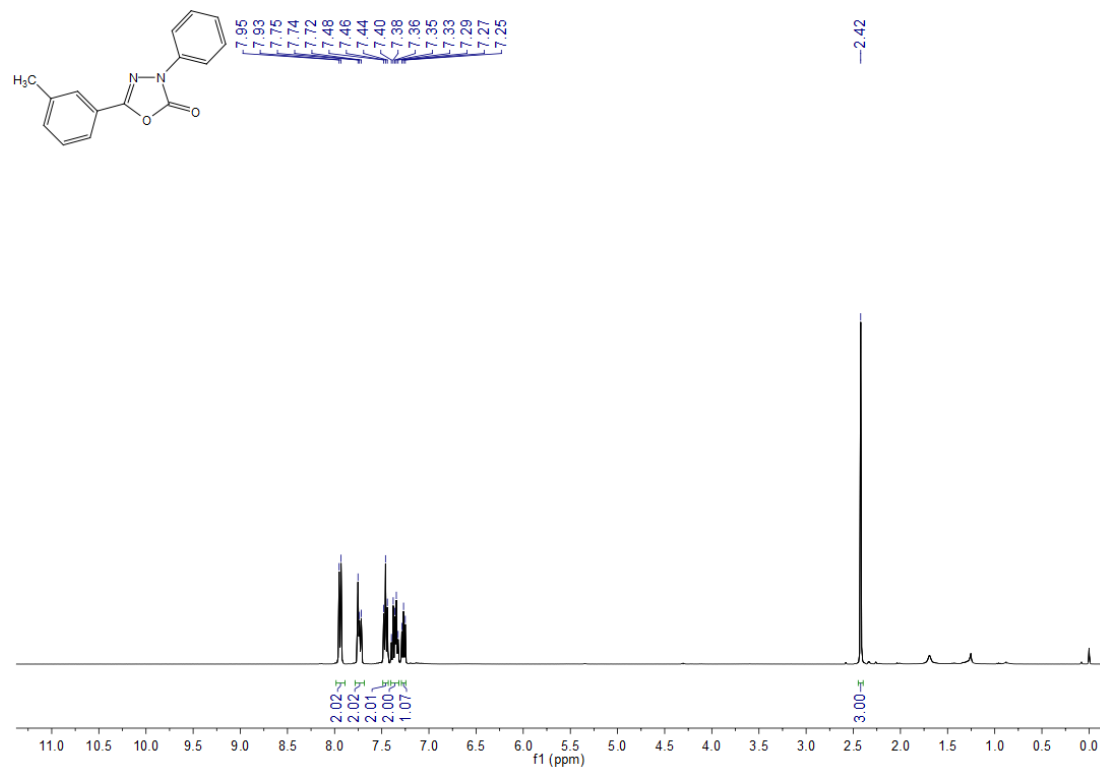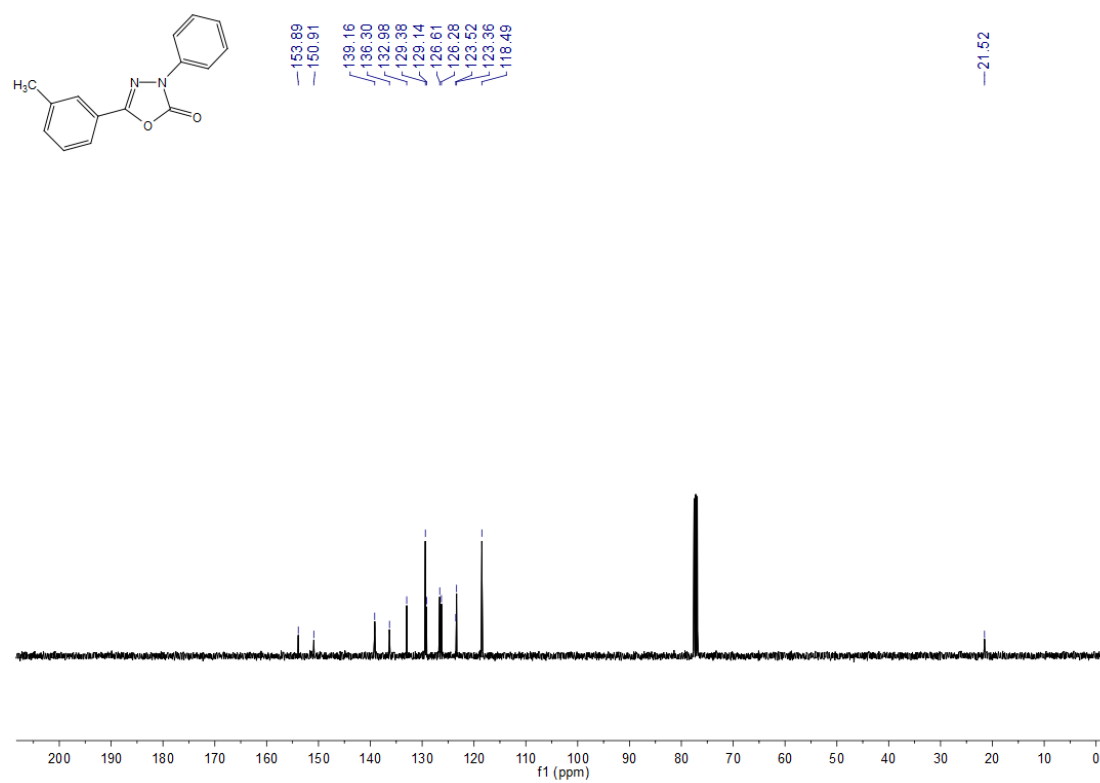

31

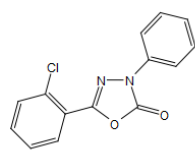

7.96  
7.84  
7.89  
7.87  
7.55  
7.53  
7.48  
7.46  
7.45  
7.41  
7.40  
7.38  
7.30  
7.28  
7.26

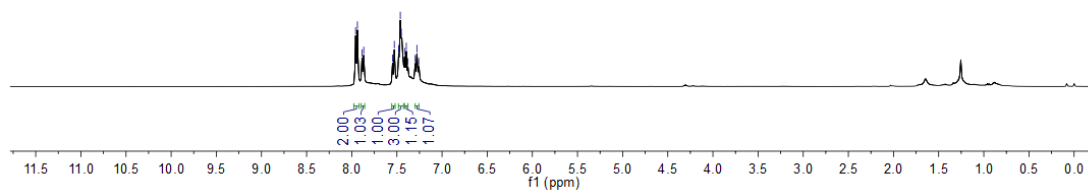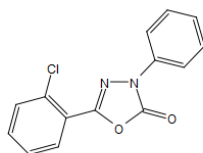

151.84  
150.40  
136.13  
133.06  
132.56  
131.70  
130.19  
129.37  
127.22  
126.41  
122.41  
118.48

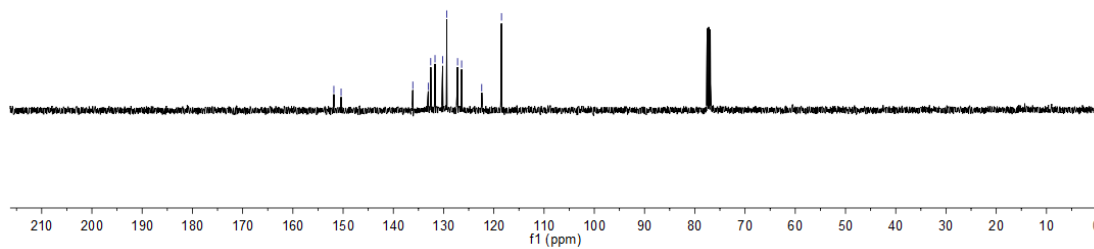

3m

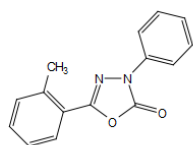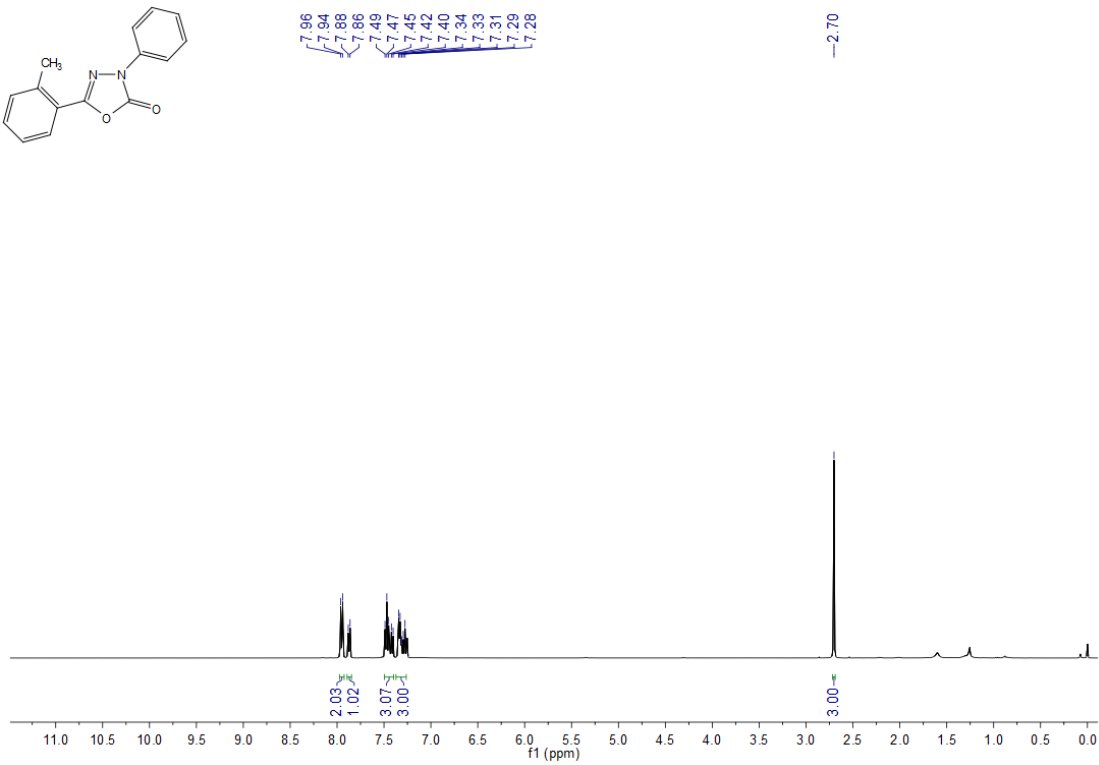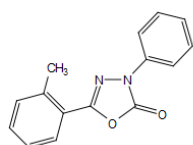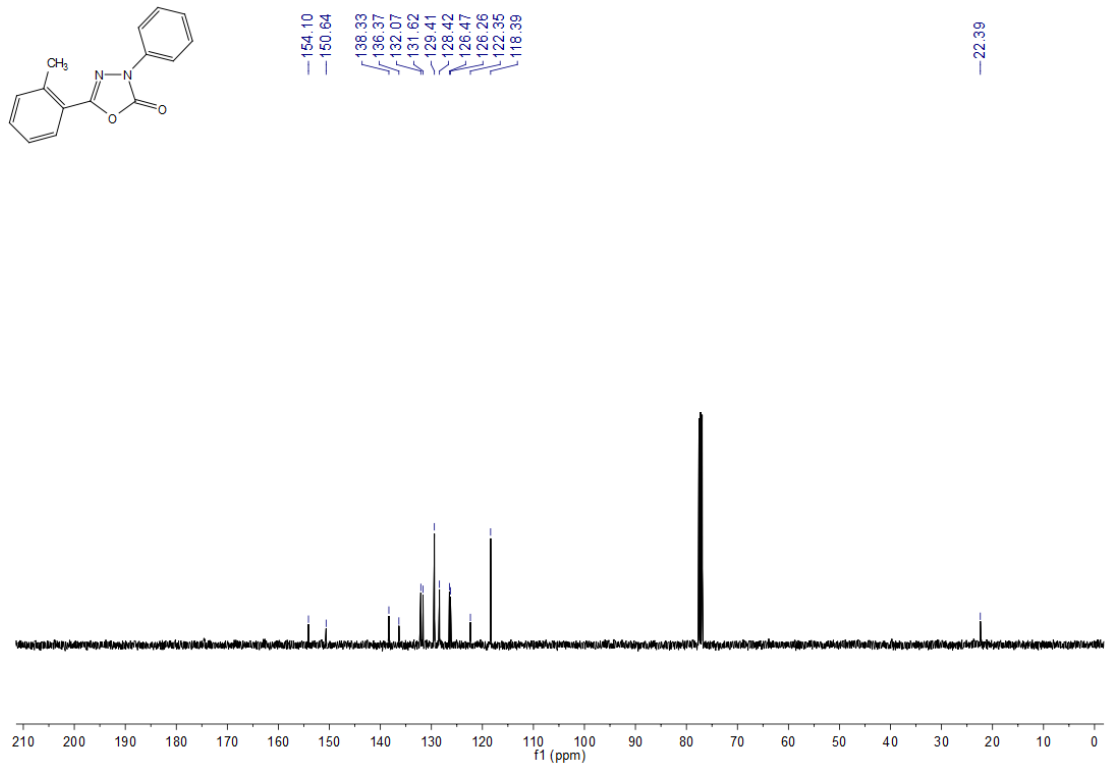



3n

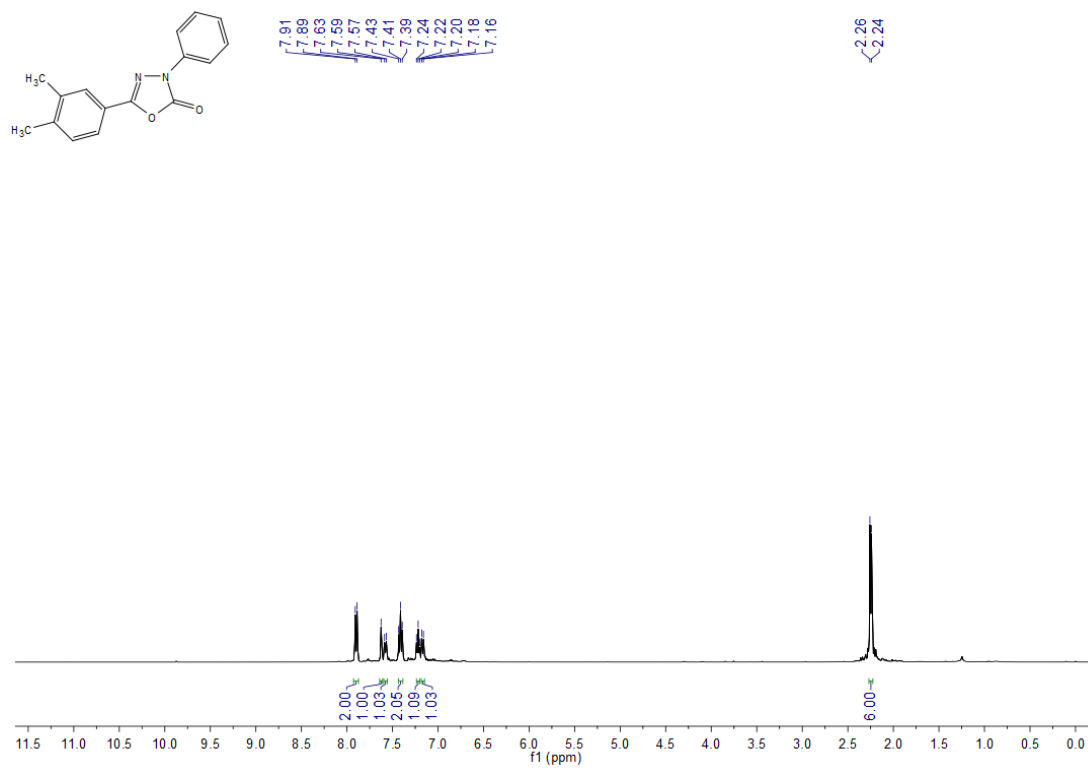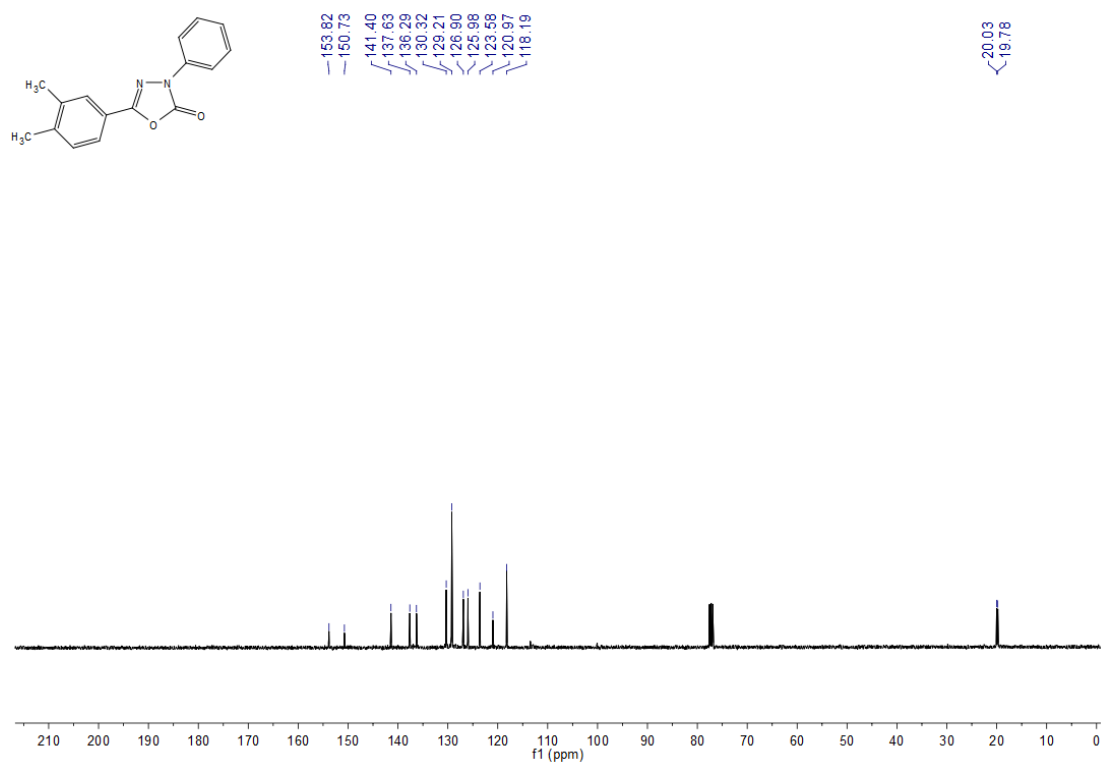

3o

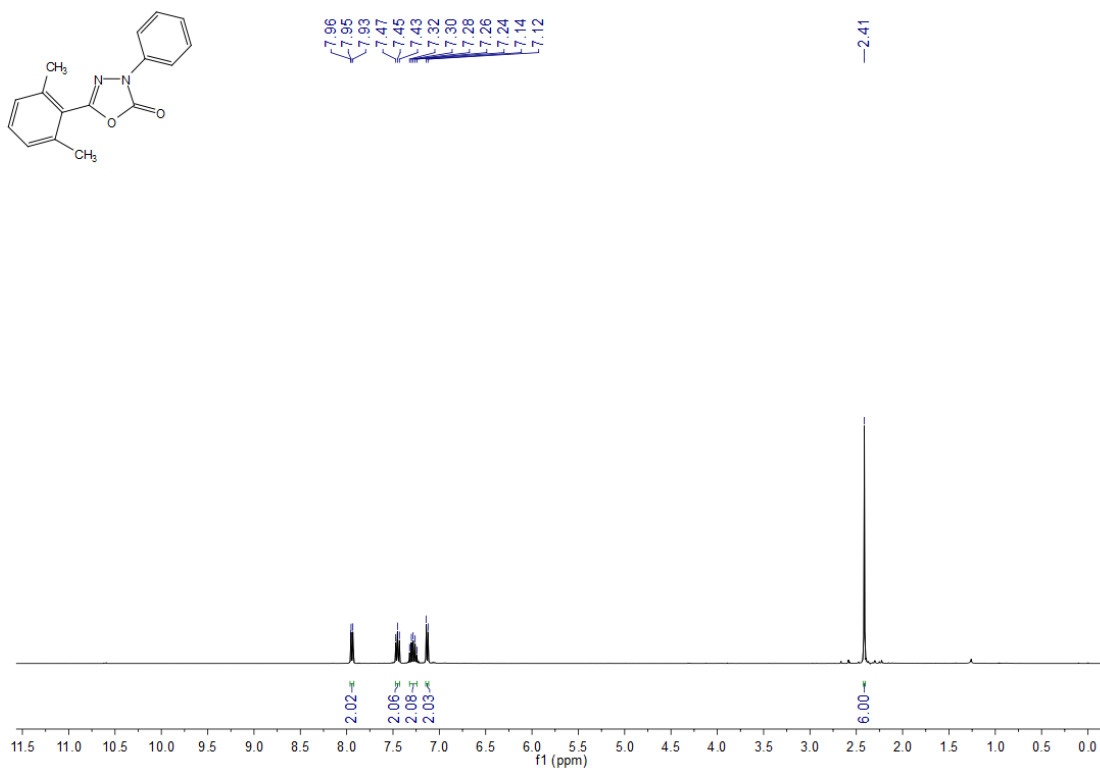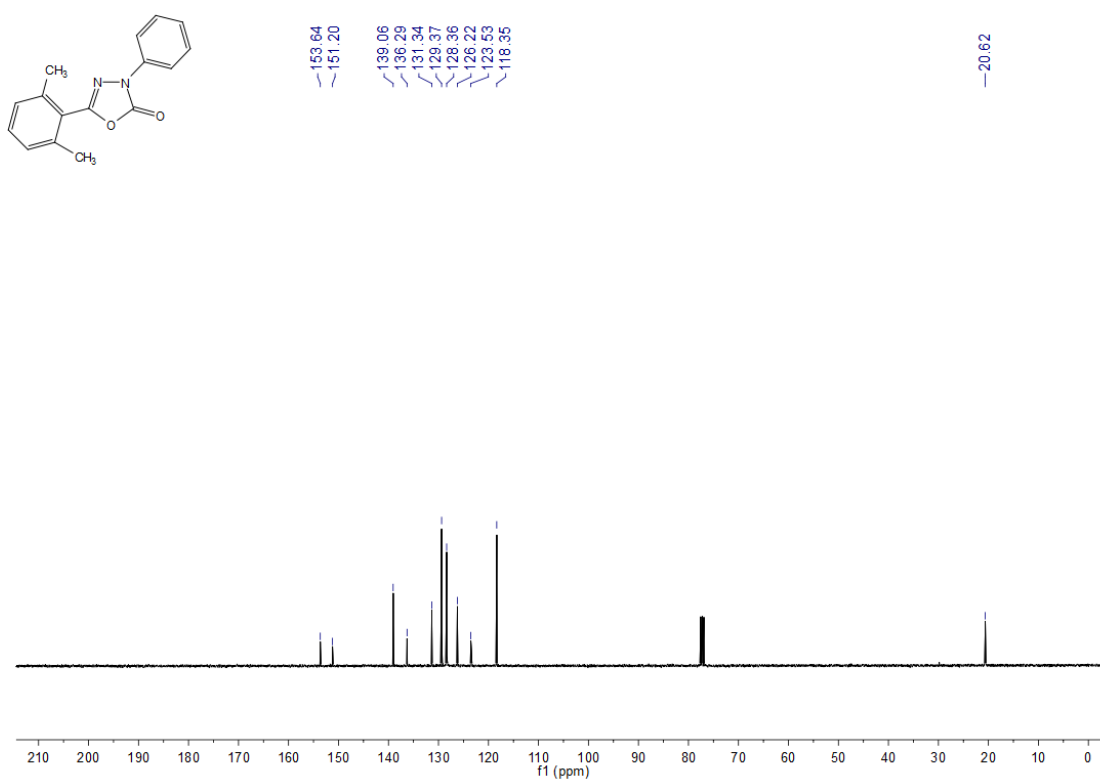

3p

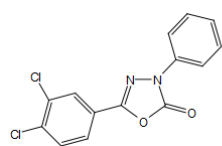

8.00  
7.91  
7.89  
7.75  
7.74  
7.73  
7.72  
7.58  
7.56  
7.47  
7.45  
7.43  
7.30  
7.28  
7.26

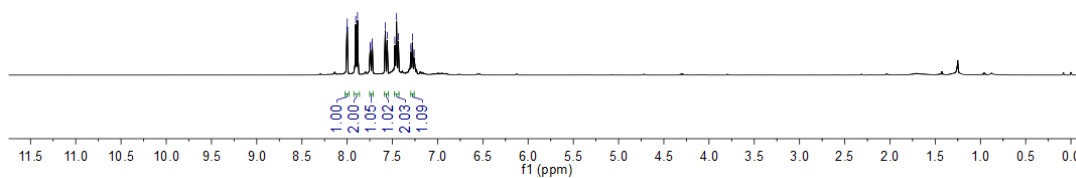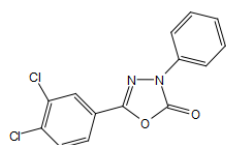

151.88  
150.35  
136.65  
135.99  
134.03  
131.46  
129.46  
127.85  
126.62  
125.07  
123.44  
118.47

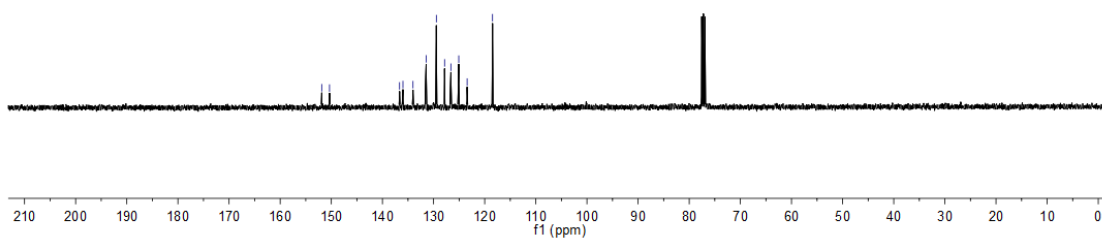

3q

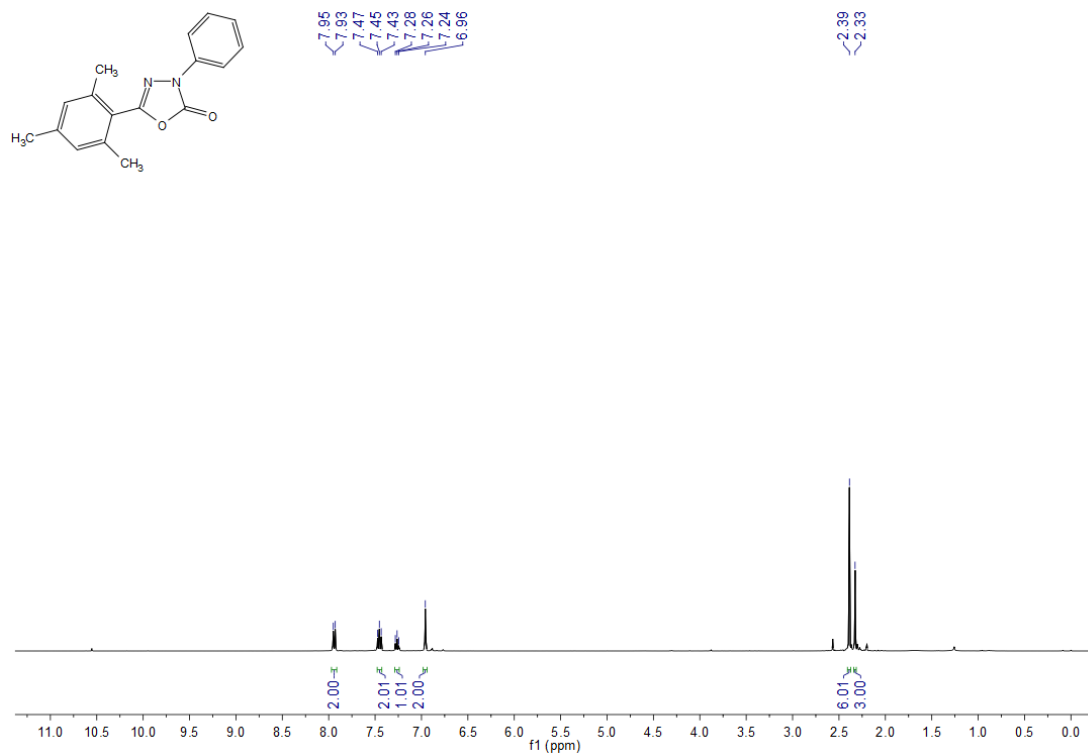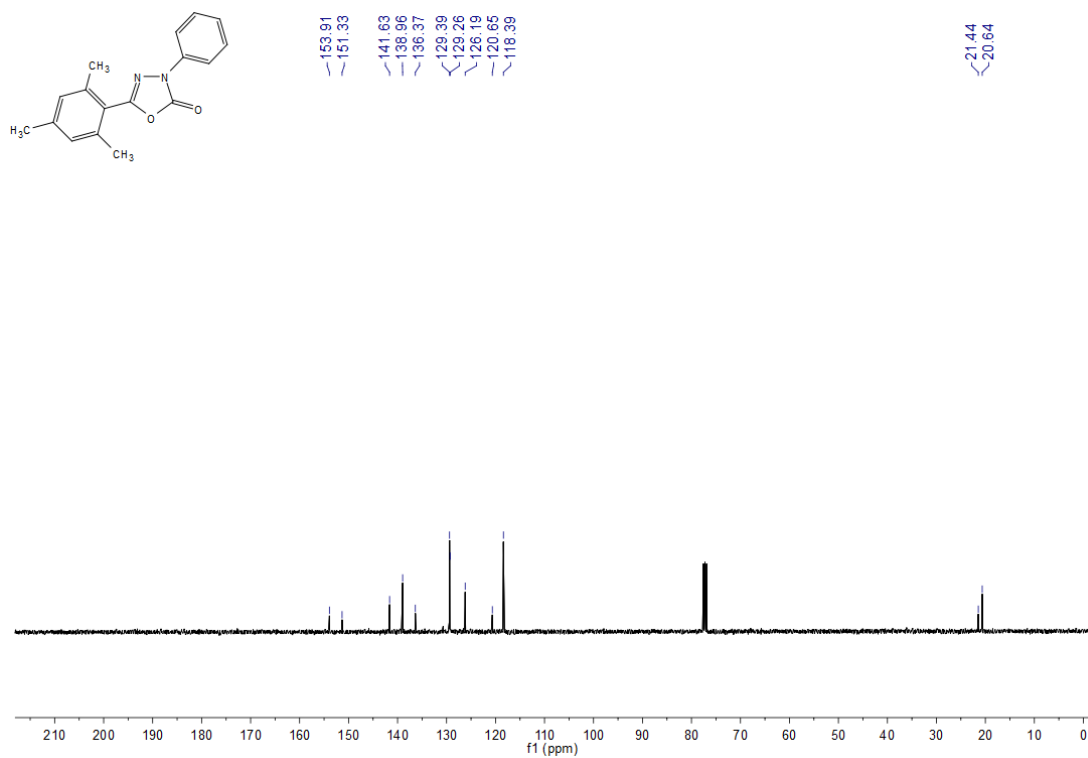

3r

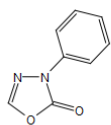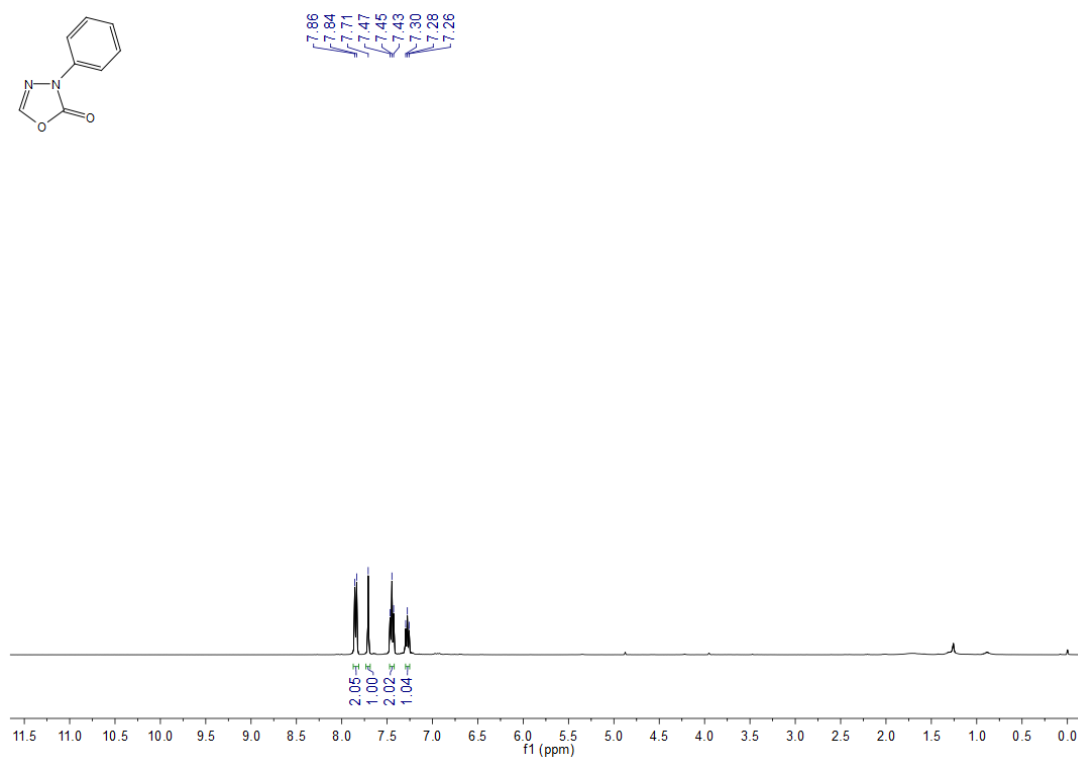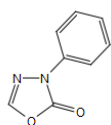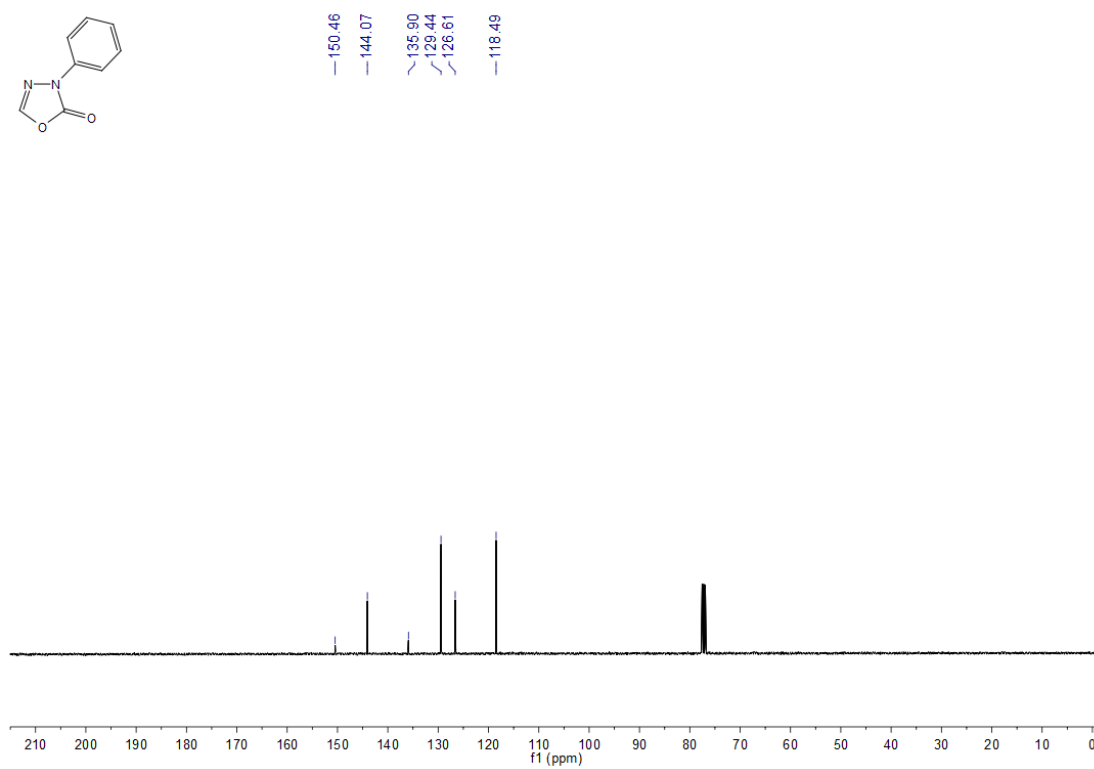

3s

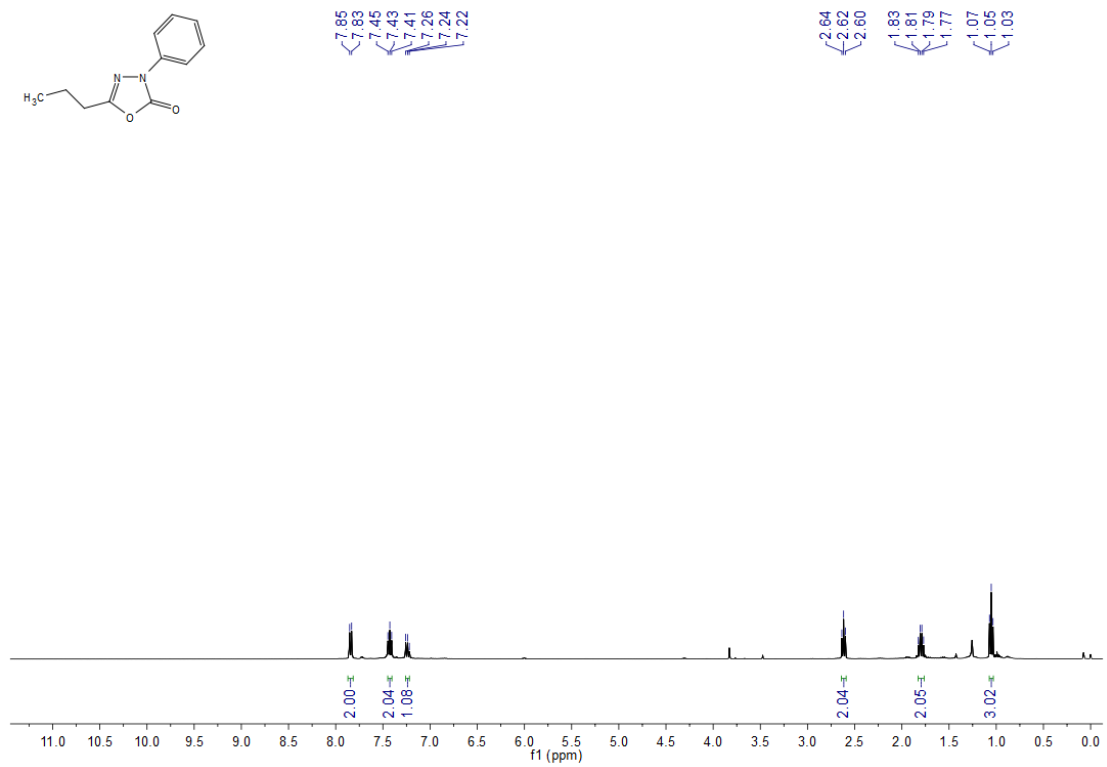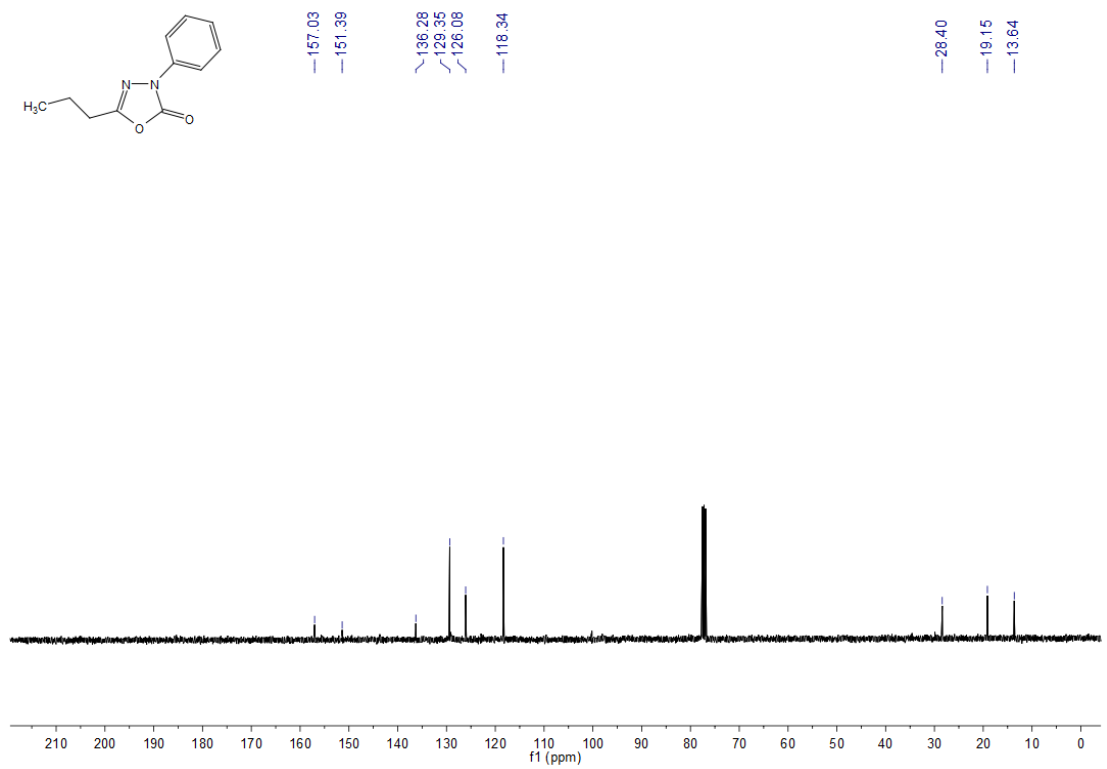

3t

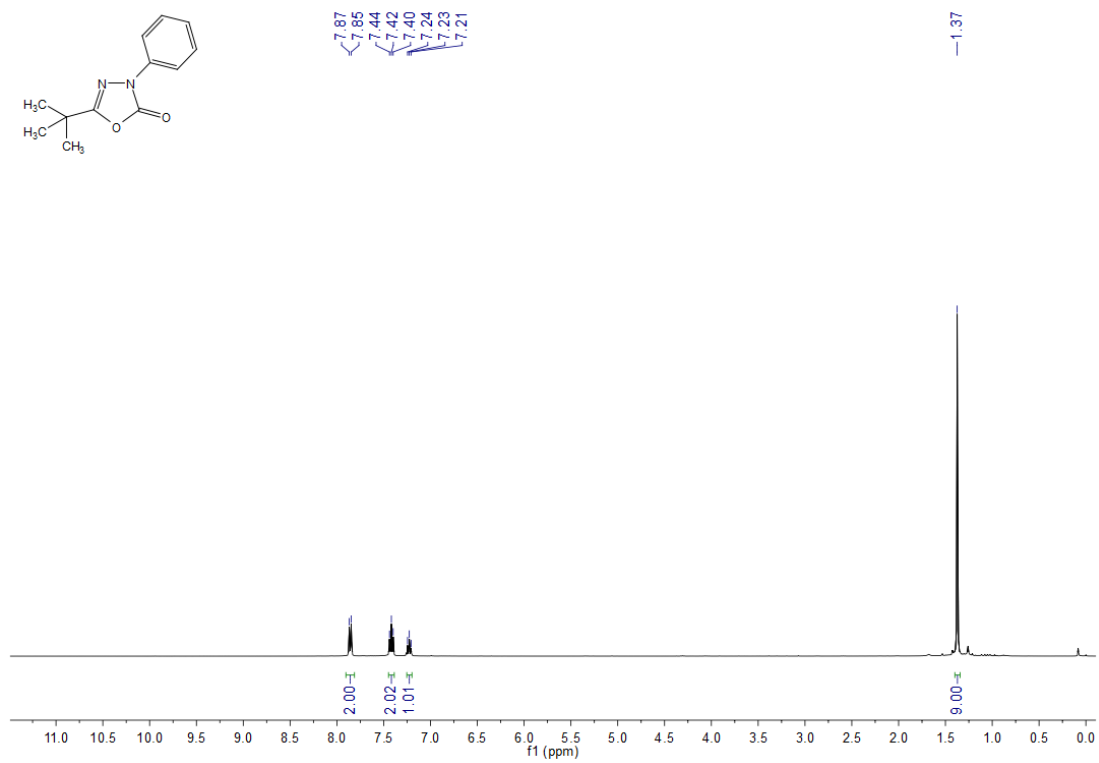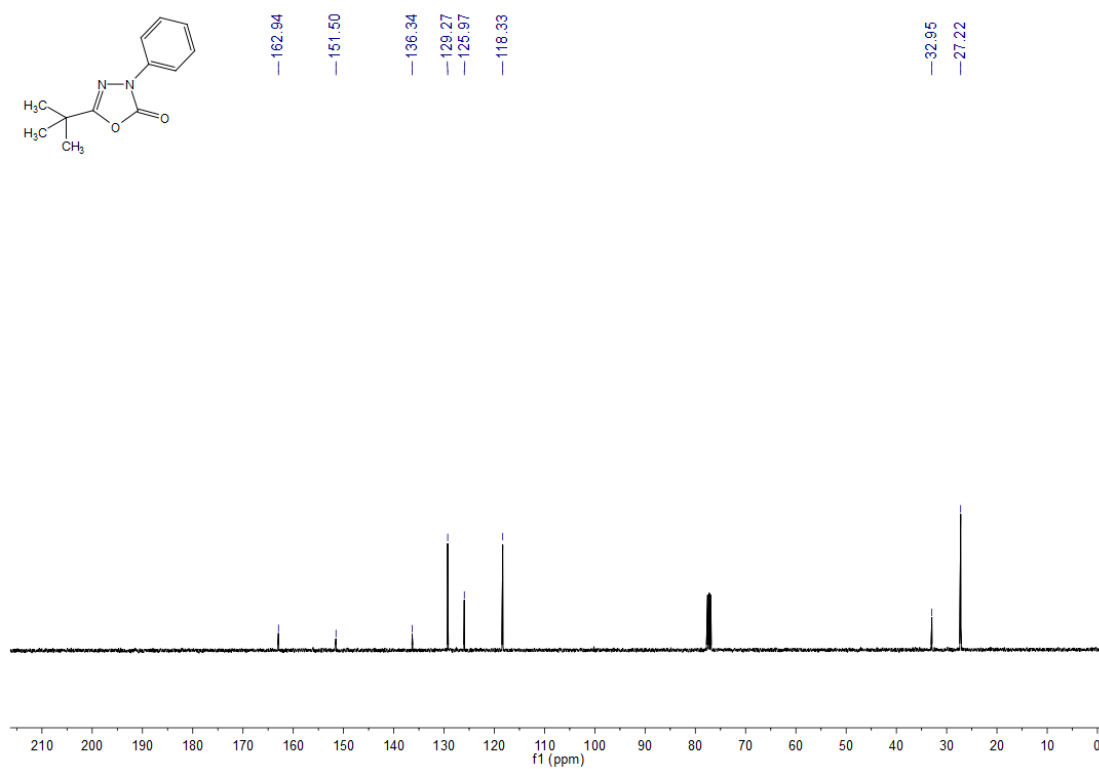

3v

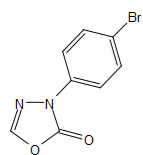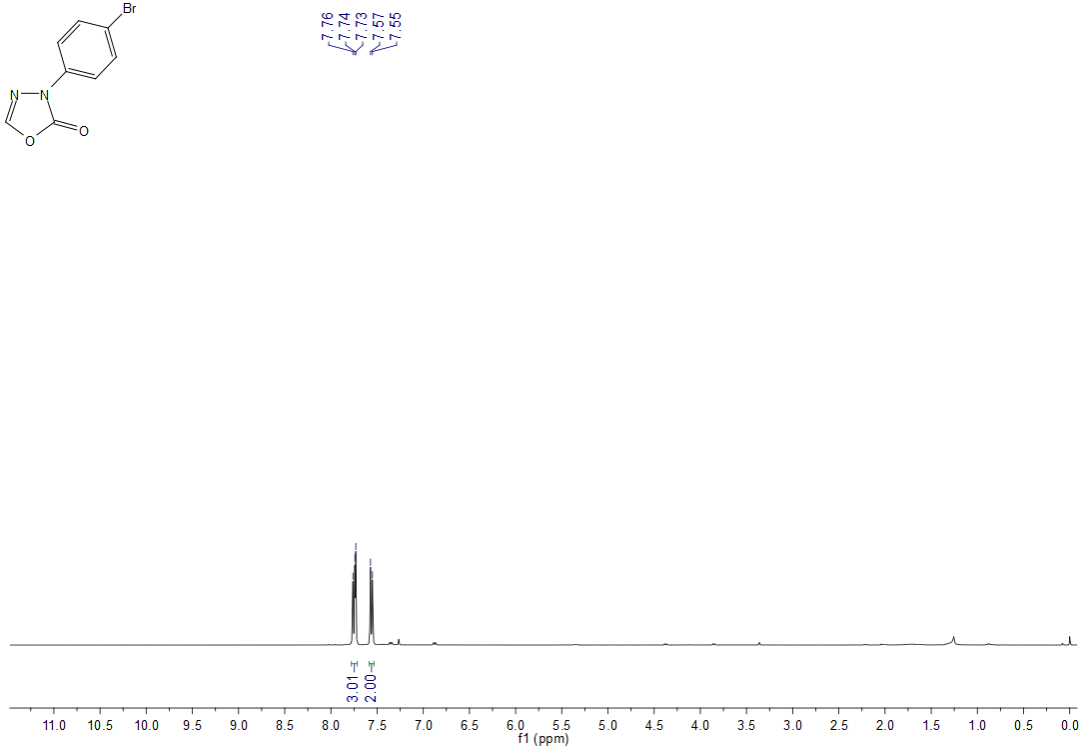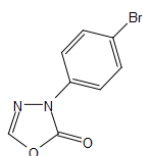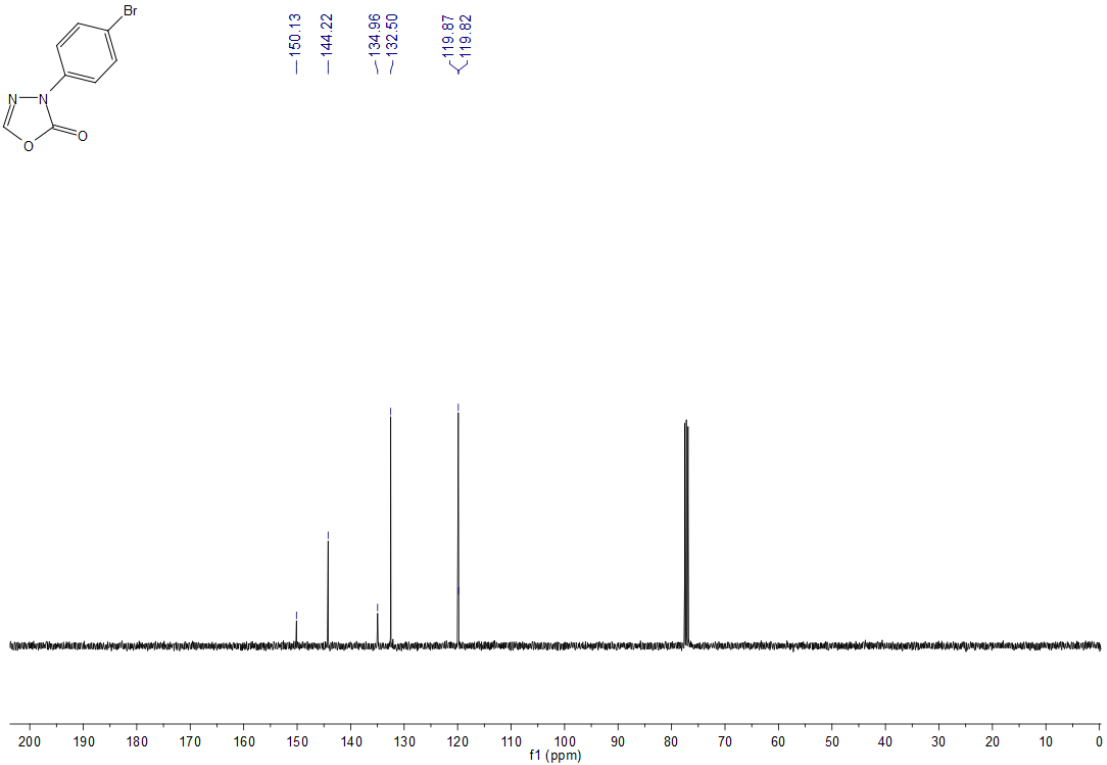



3w

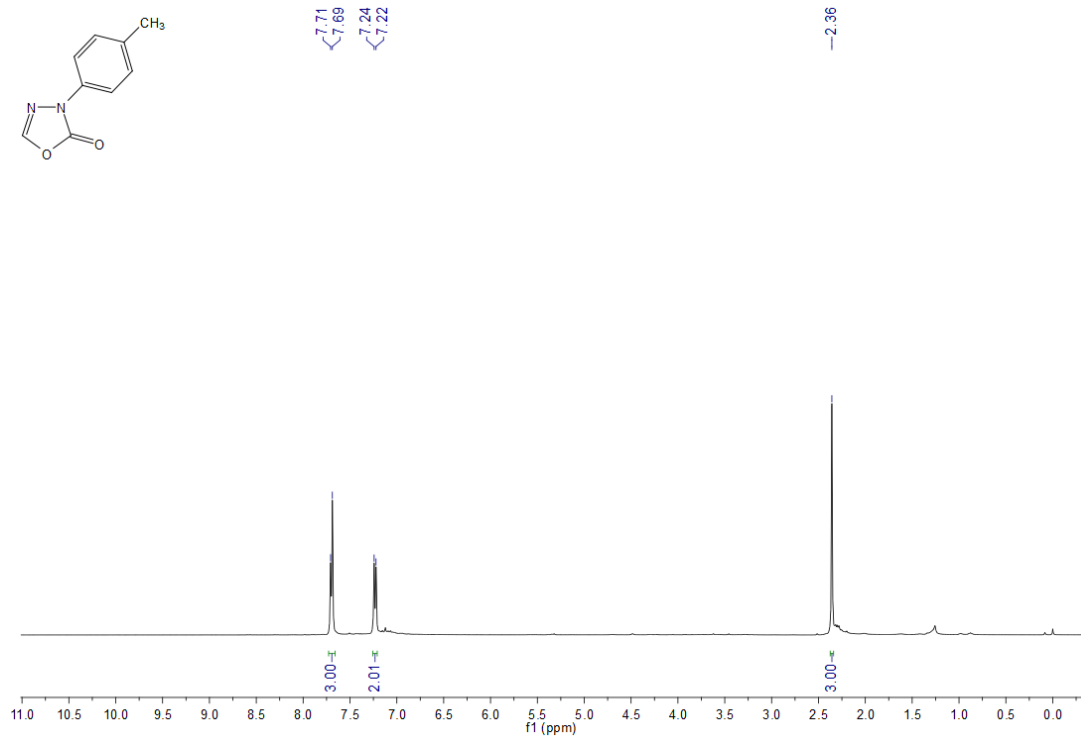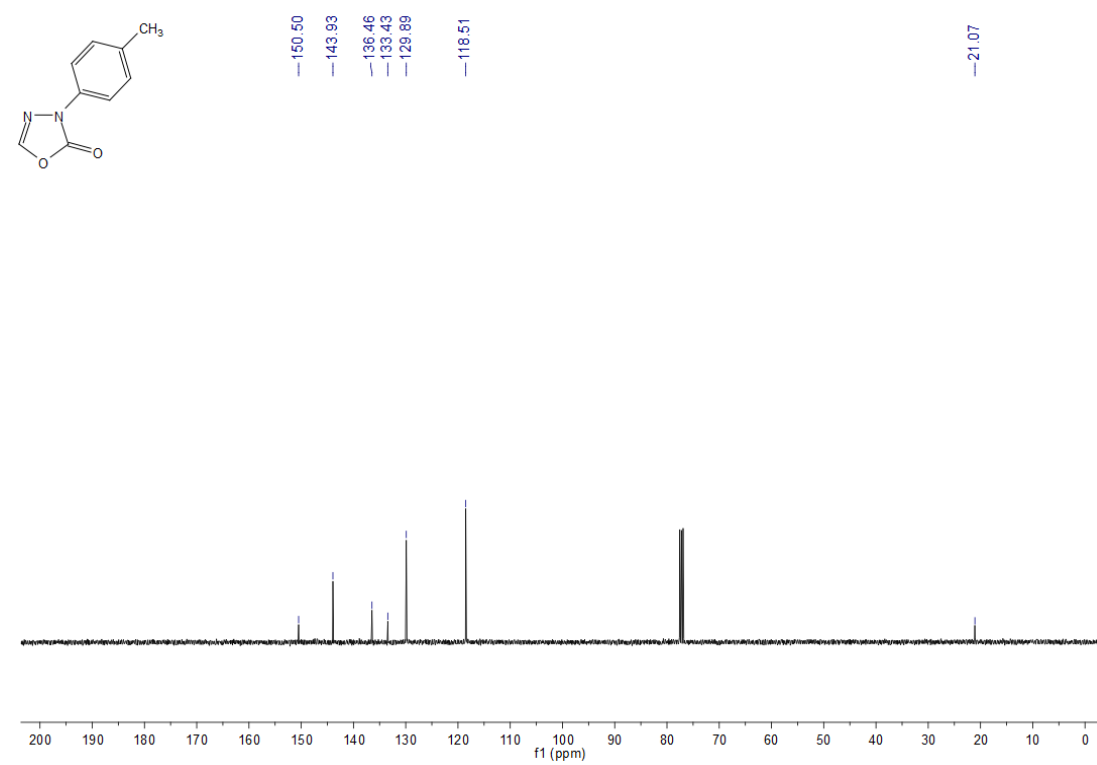

3x

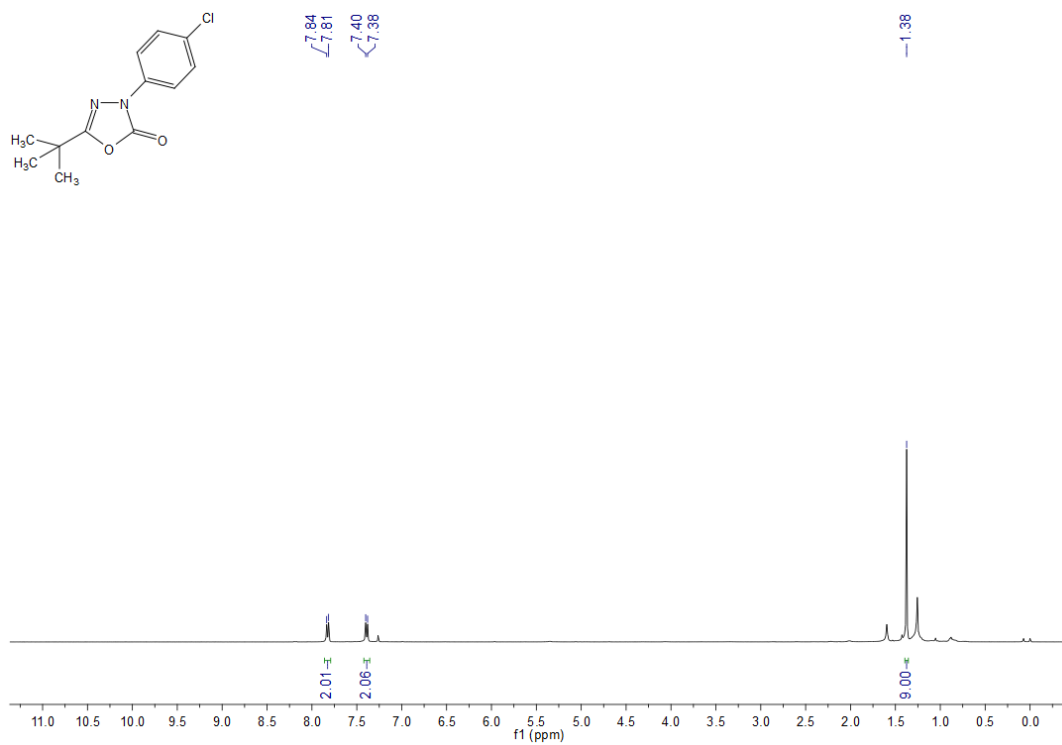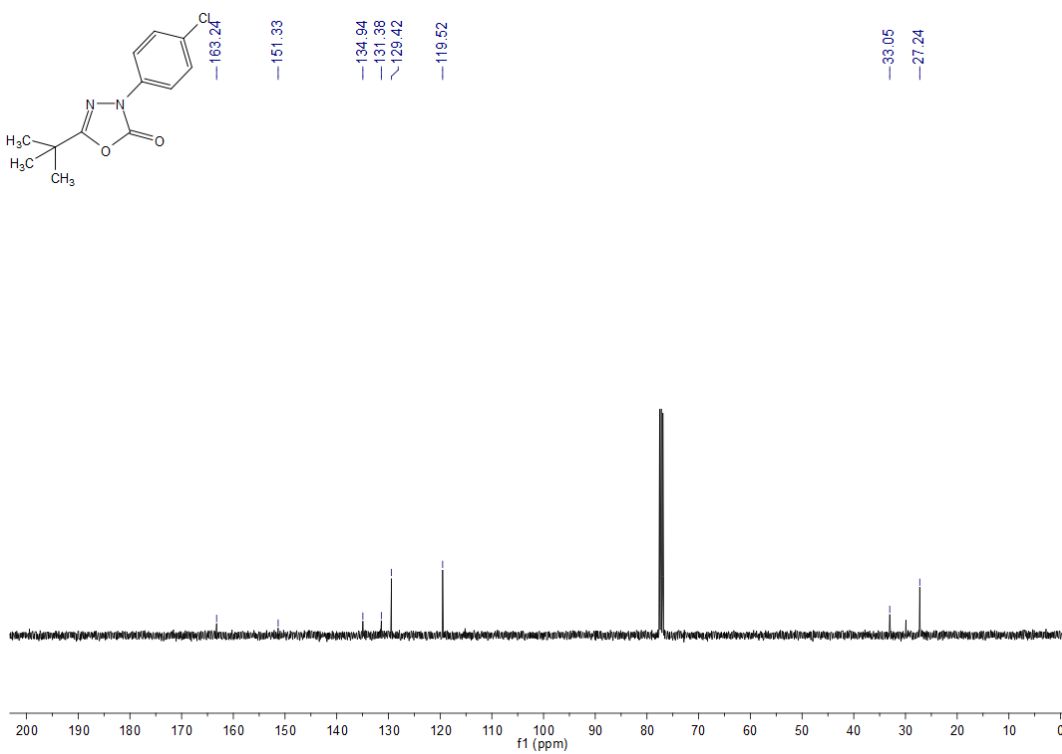

4a

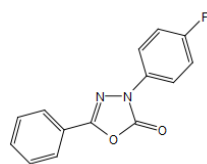

7.94  
7.93  
7.91  
7.57  
7.56  
7.54  
7.53  
7.51  
7.49  
7.18  
7.16  
7.14

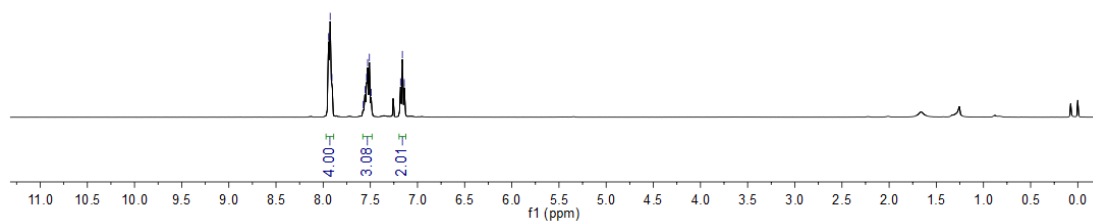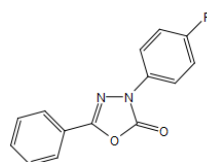

162.05  
159.60  
153.86  
150.89  
132.42  
132.39  
132.27  
129.30  
126.19  
123.55  
120.46  
120.37  
116.37  
116.15

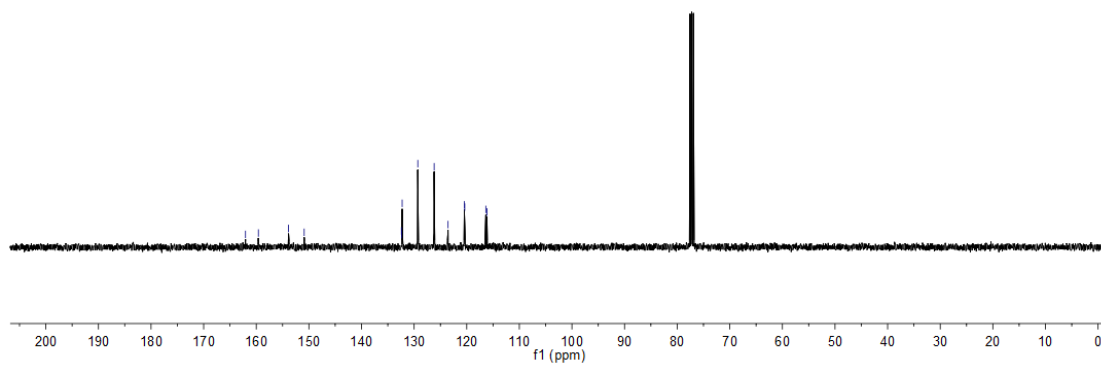

4b

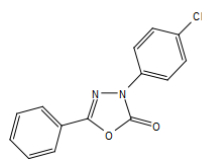

7.94  
7.92  
7.90  
7.56  
7.54  
7.53  
7.51  
7.49  
7.44  
7.42

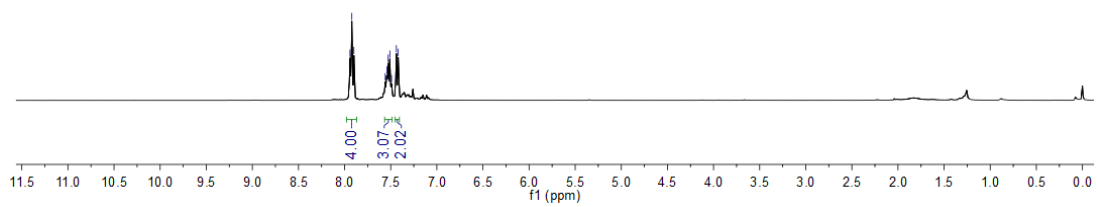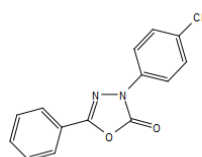

153.94  
150.66  
134.81  
132.35  
131.74  
129.50  
128.29  
126.22  
123.42  
119.63

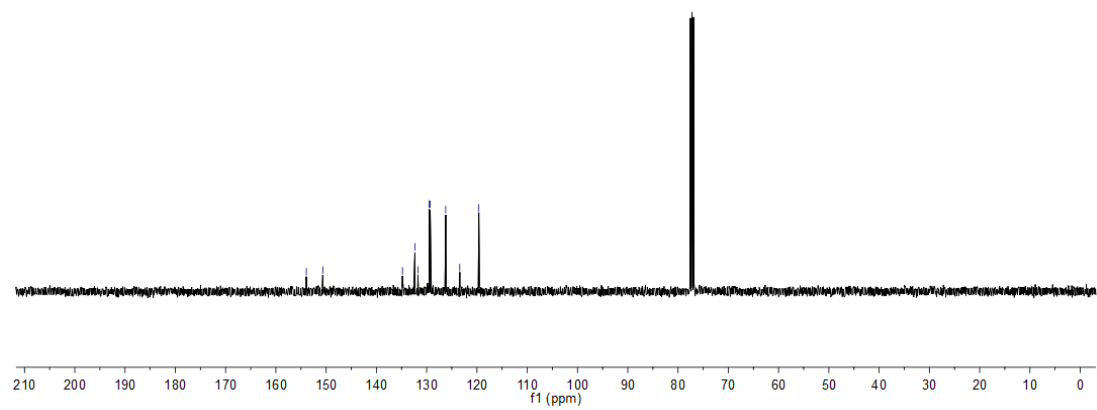

4c

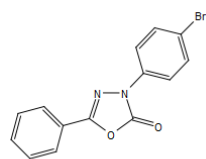

7.93  
7.91  
7.85  
7.83  
7.57  
7.55  
7.53  
7.52  
7.50  
7.48

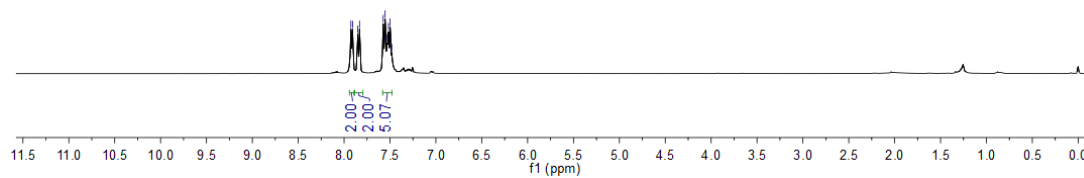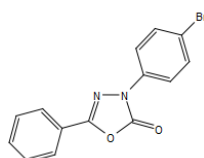

153.91  
150.56  
135.30  
132.42  
132.33  
129.27  
126.19  
123.36  
119.85  
119.45

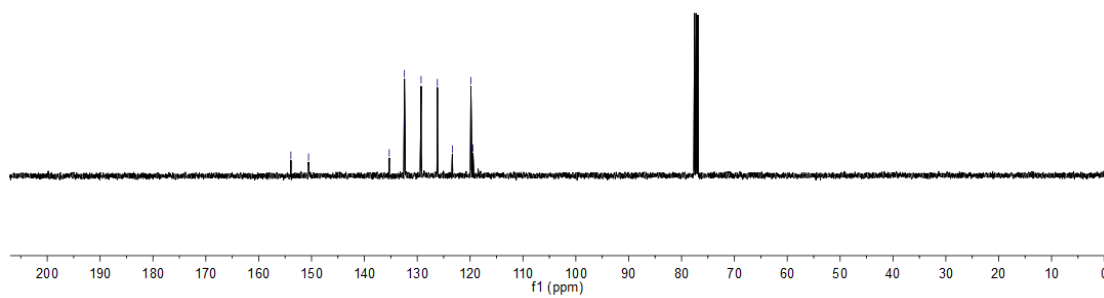

4d

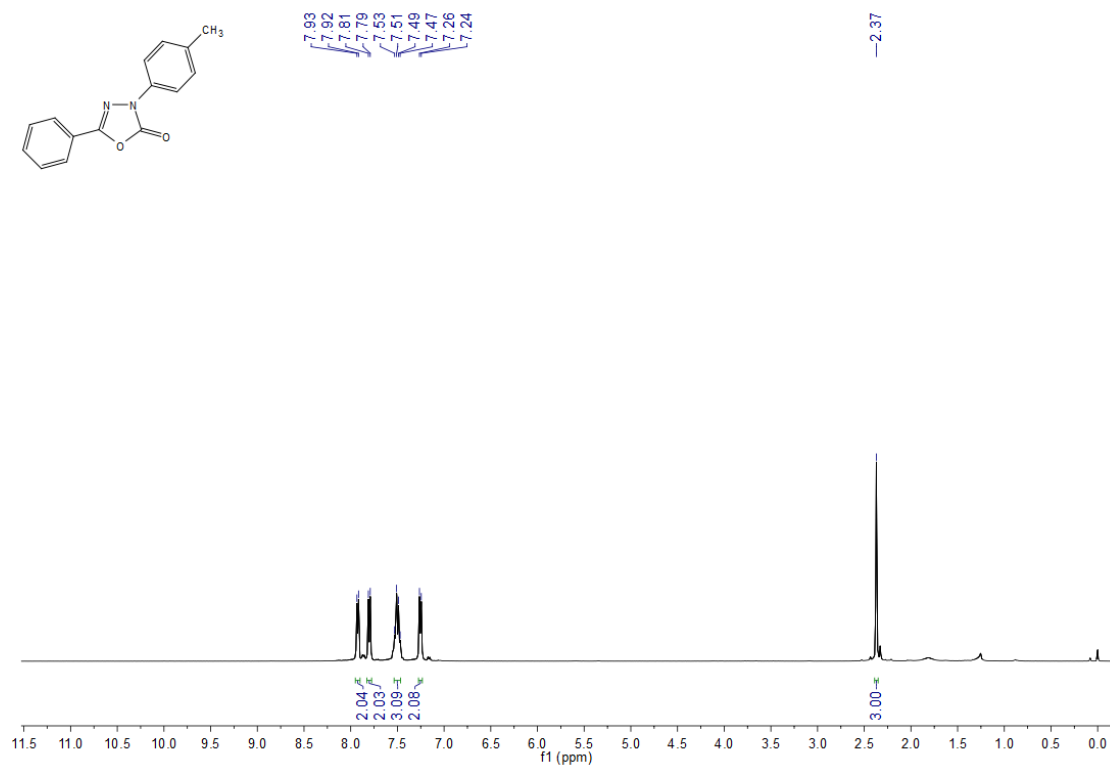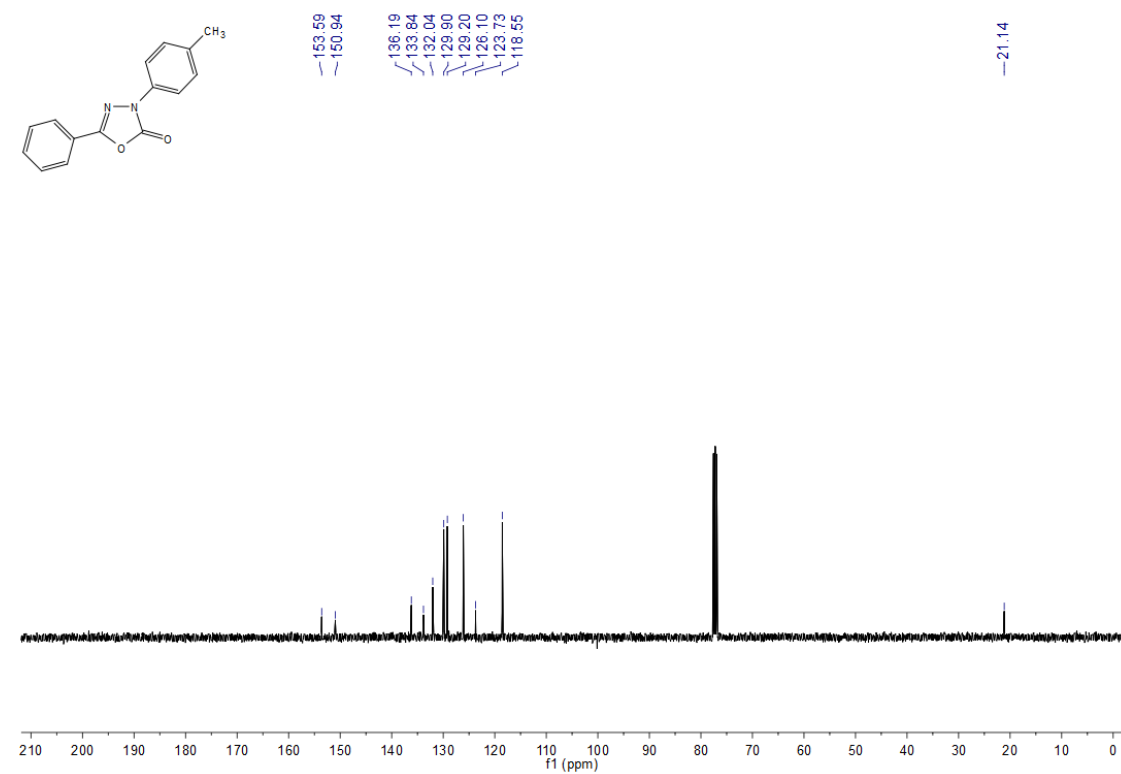

4e

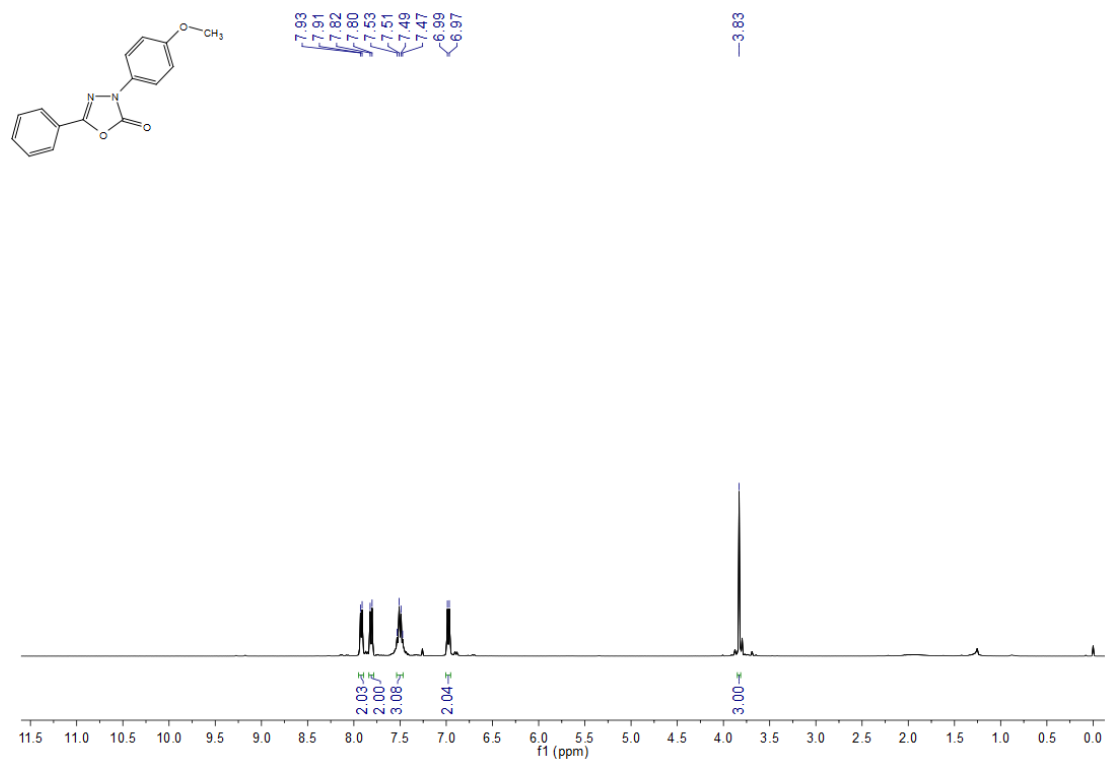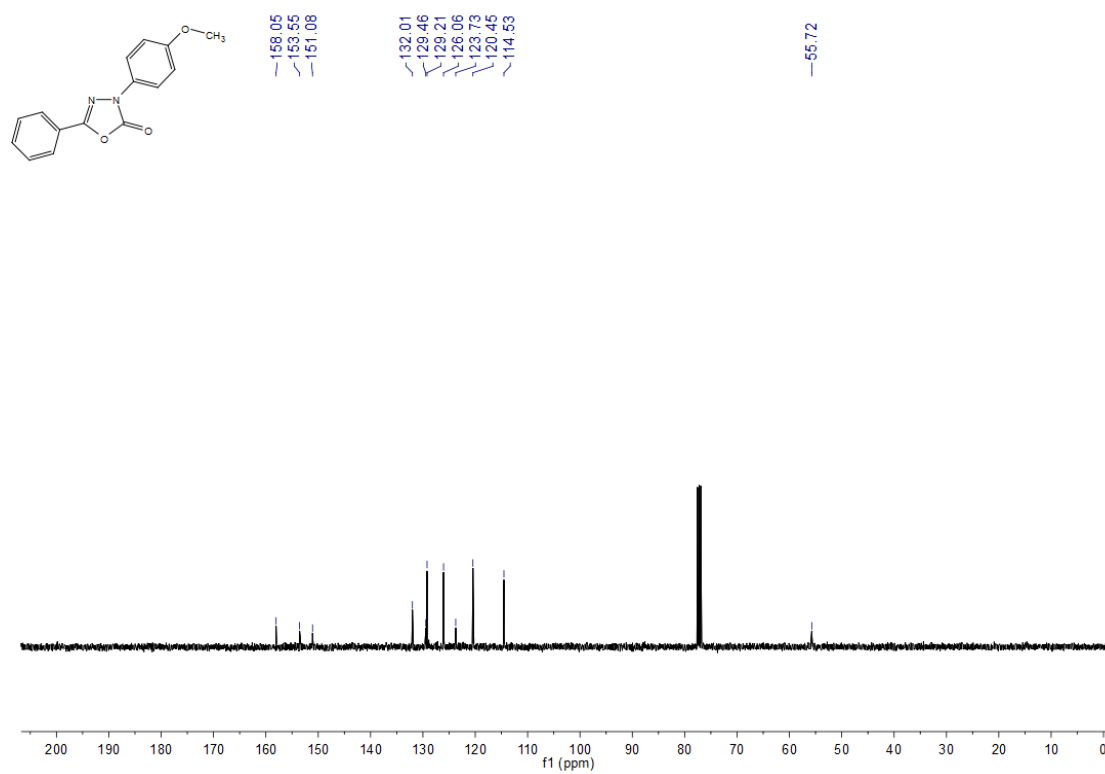

4f

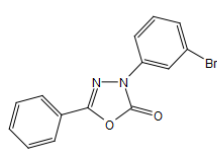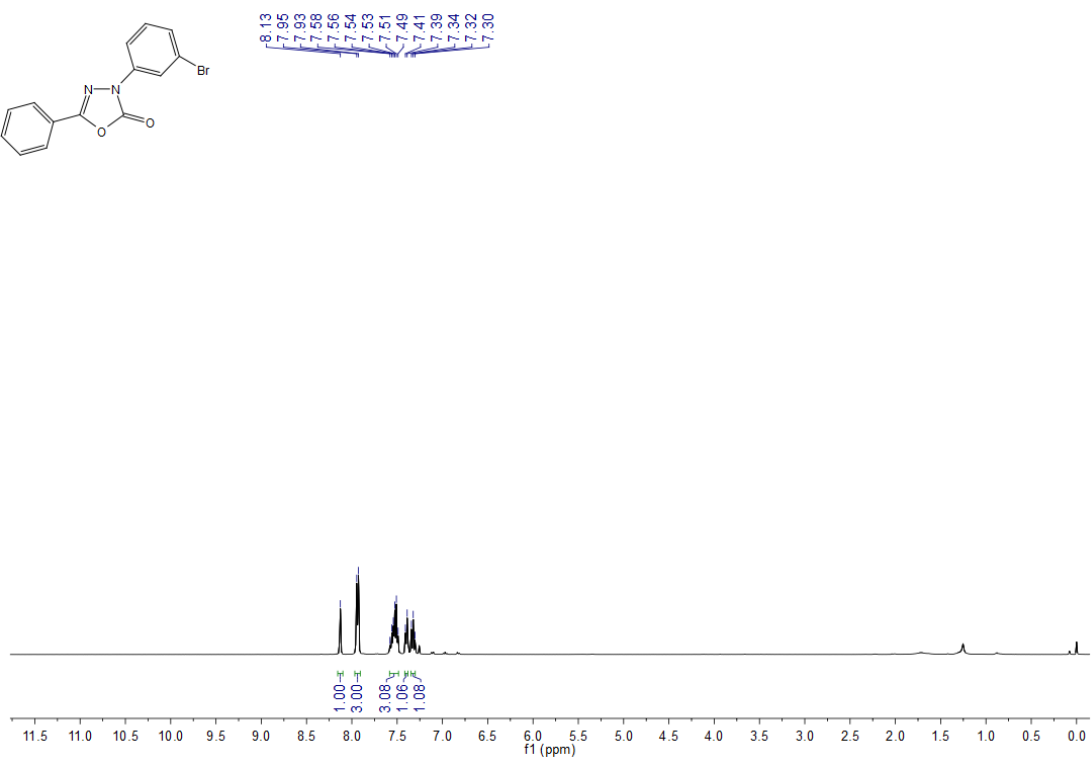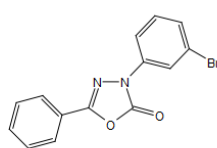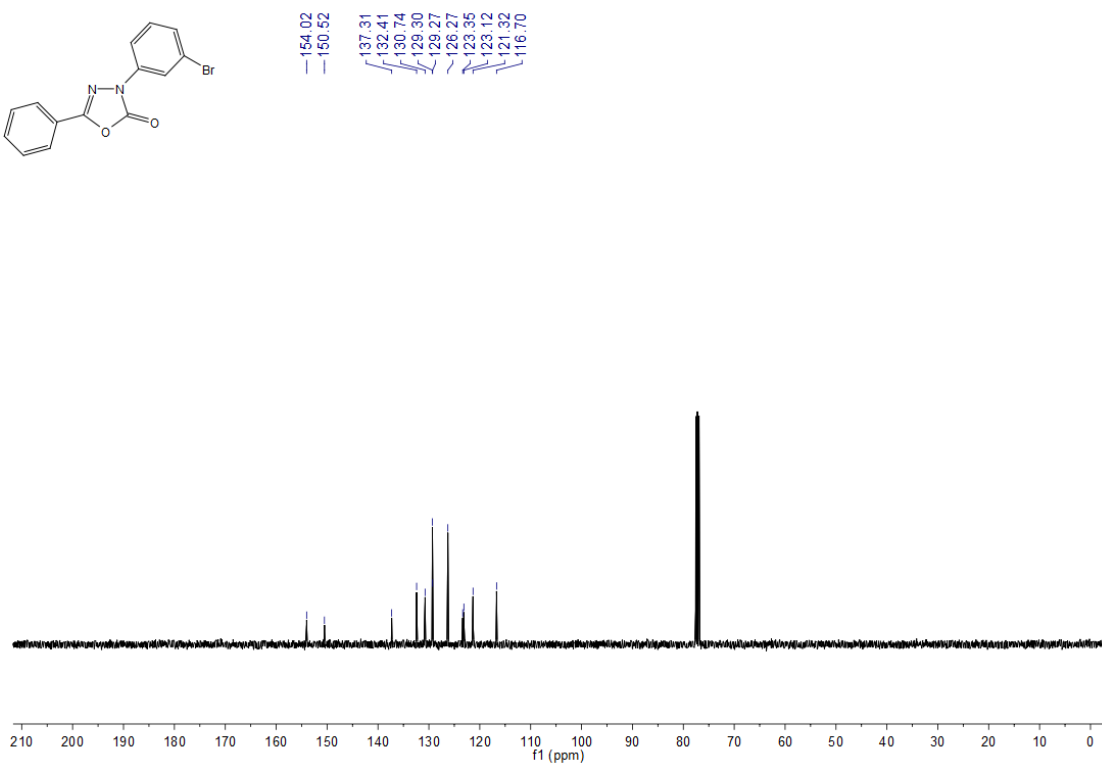



4g

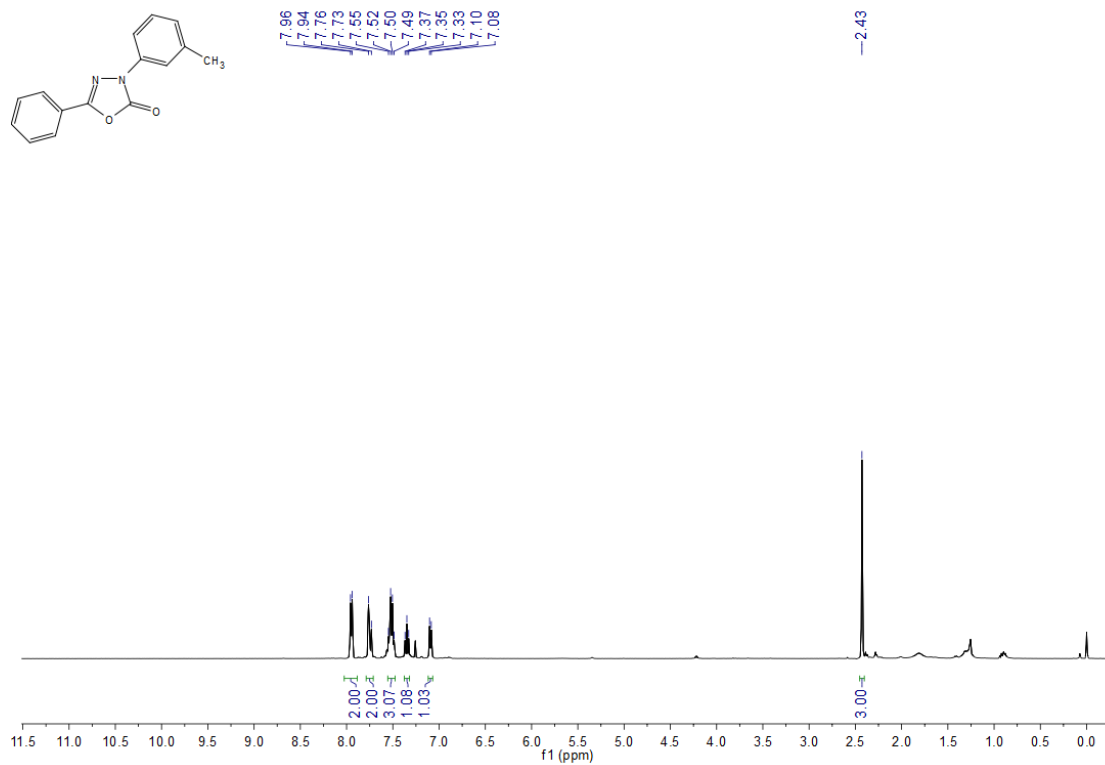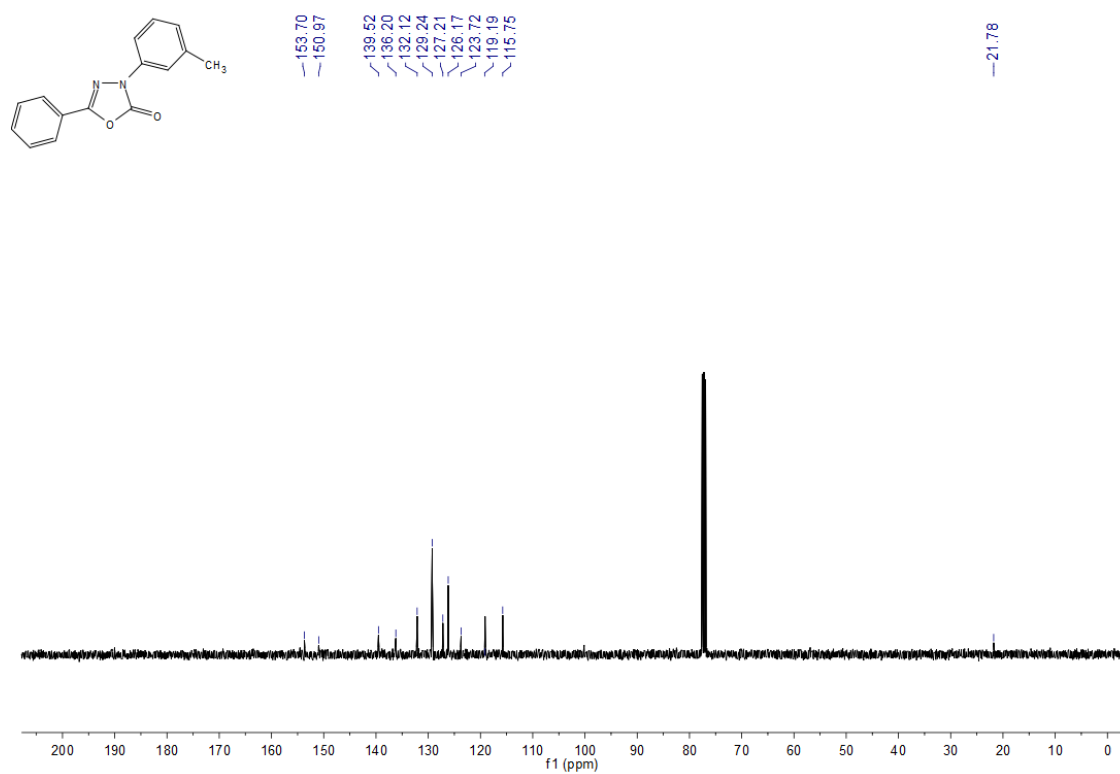

4h

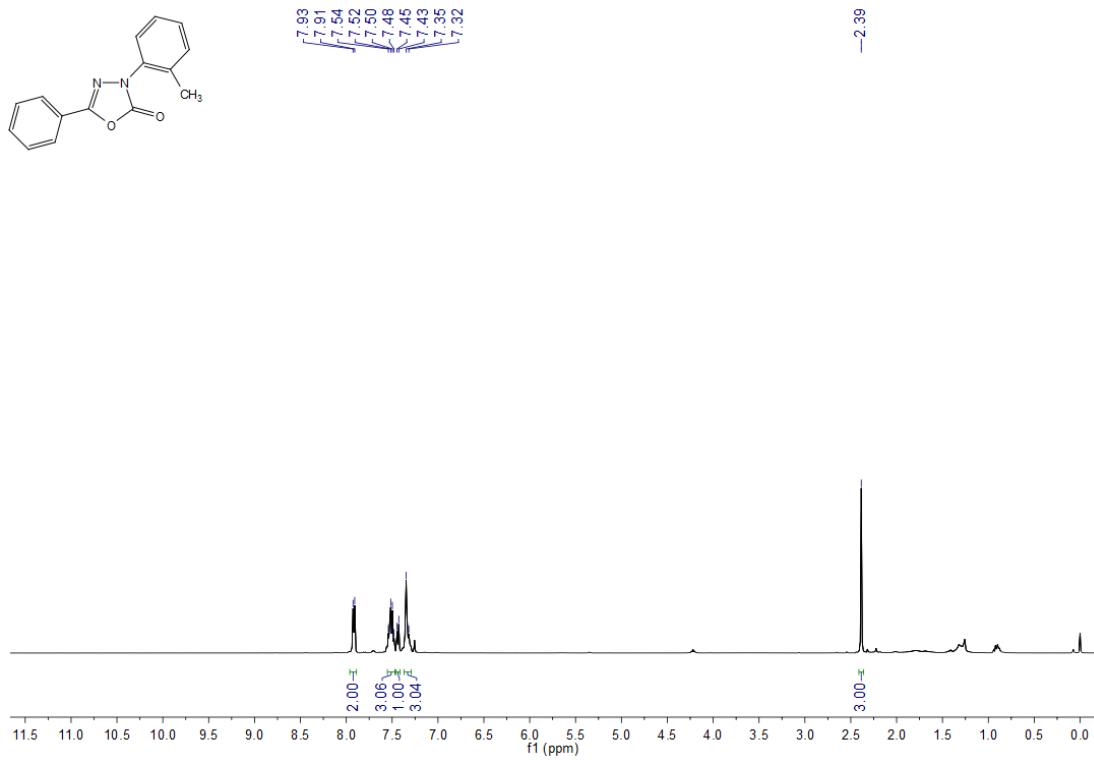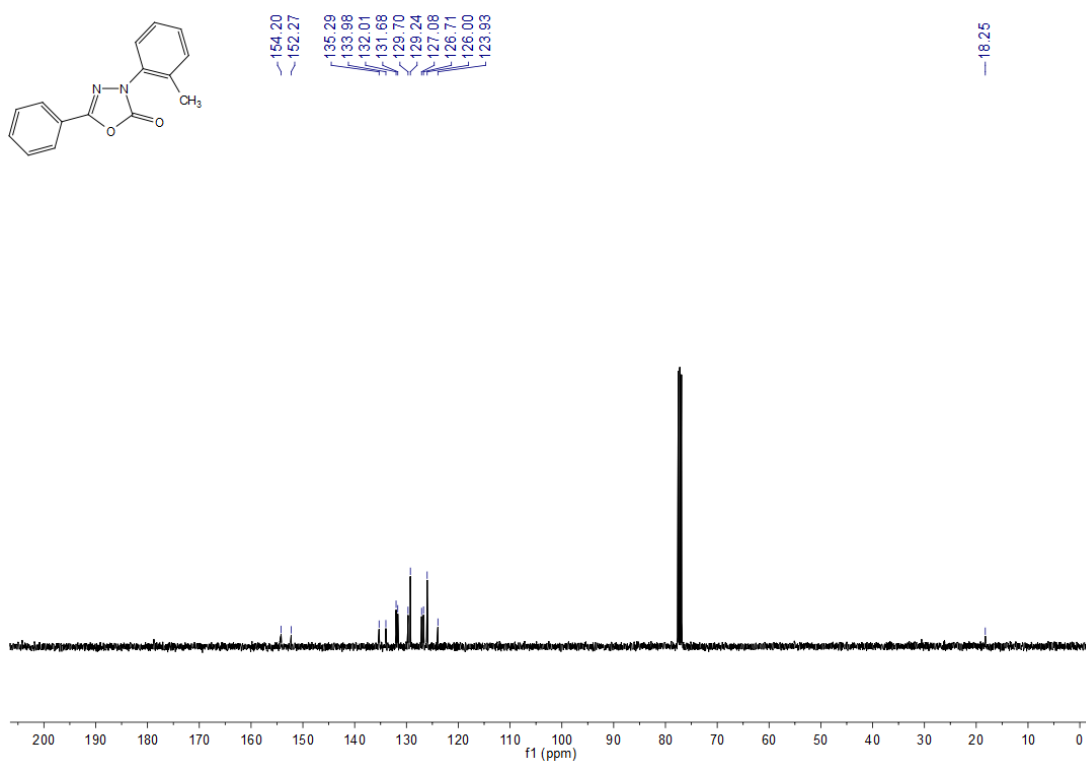

4i

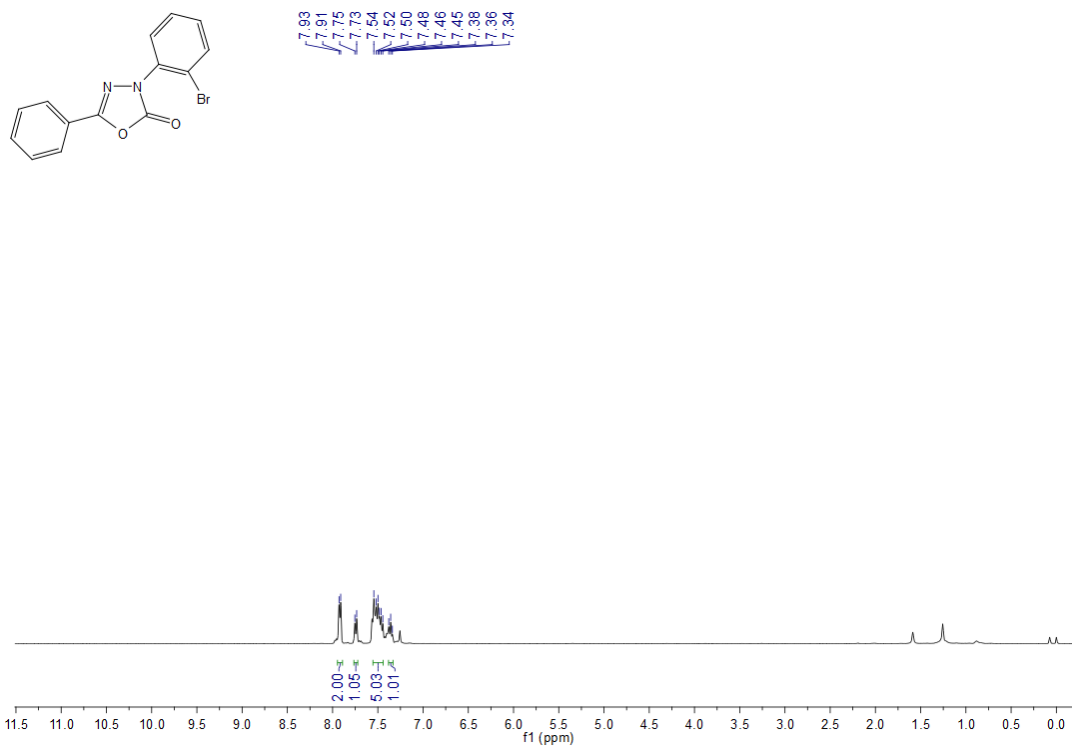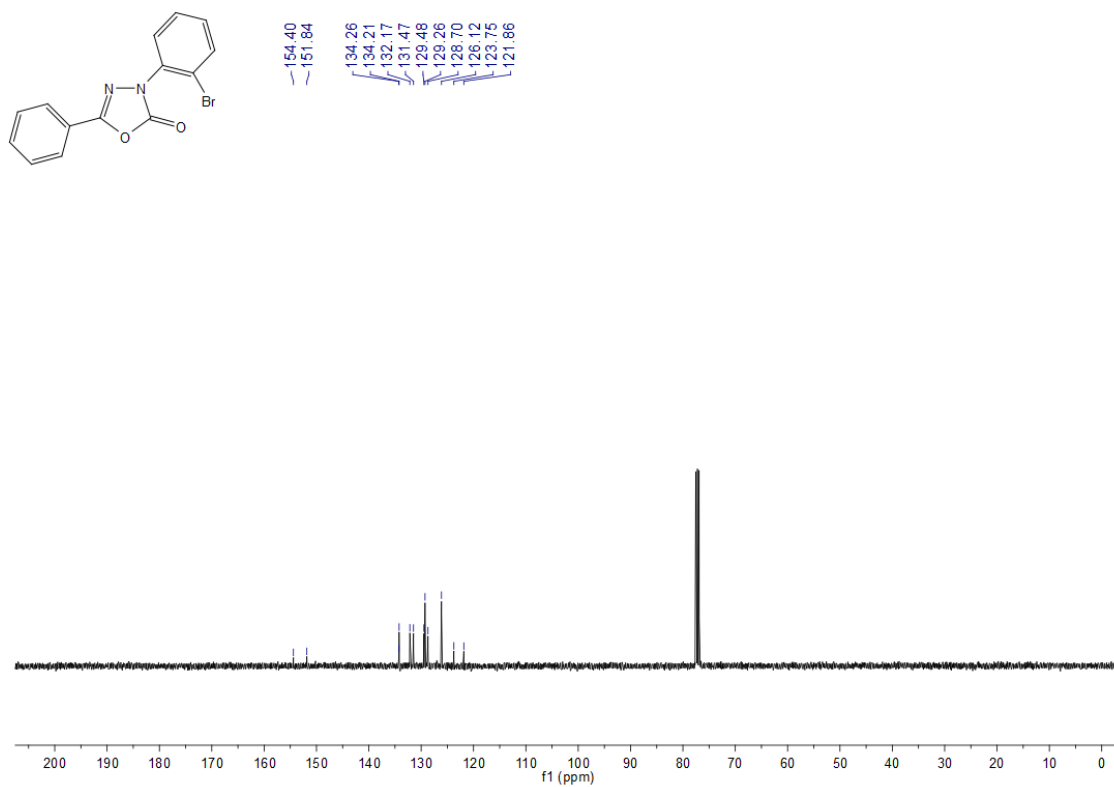

4j

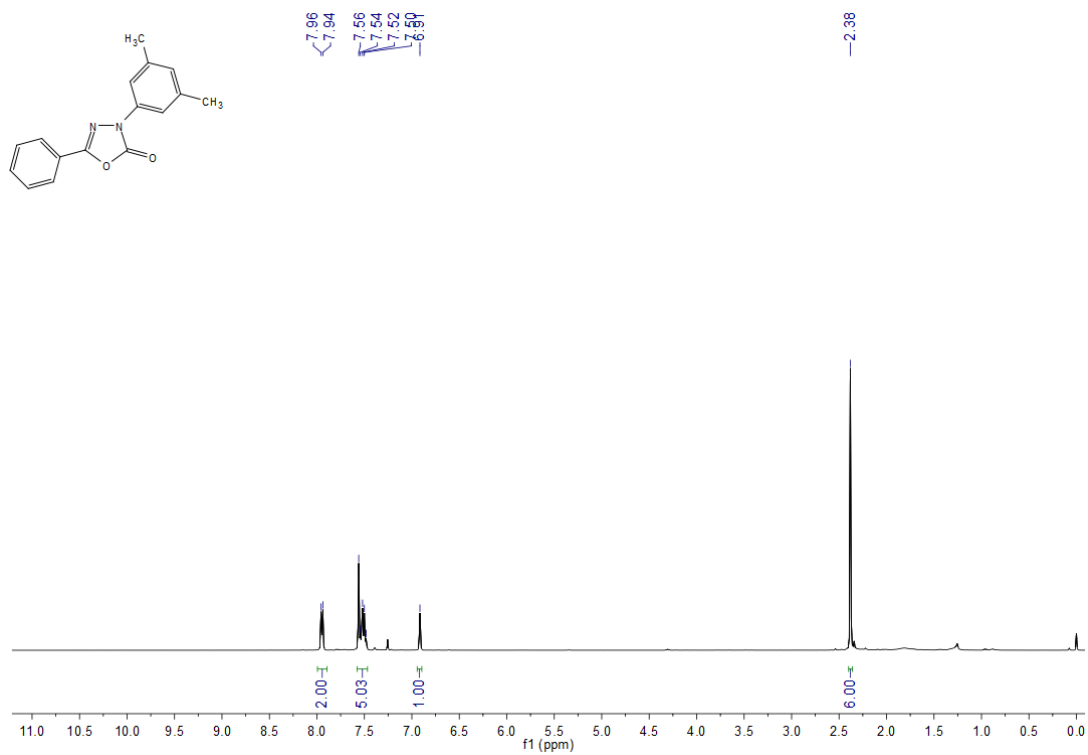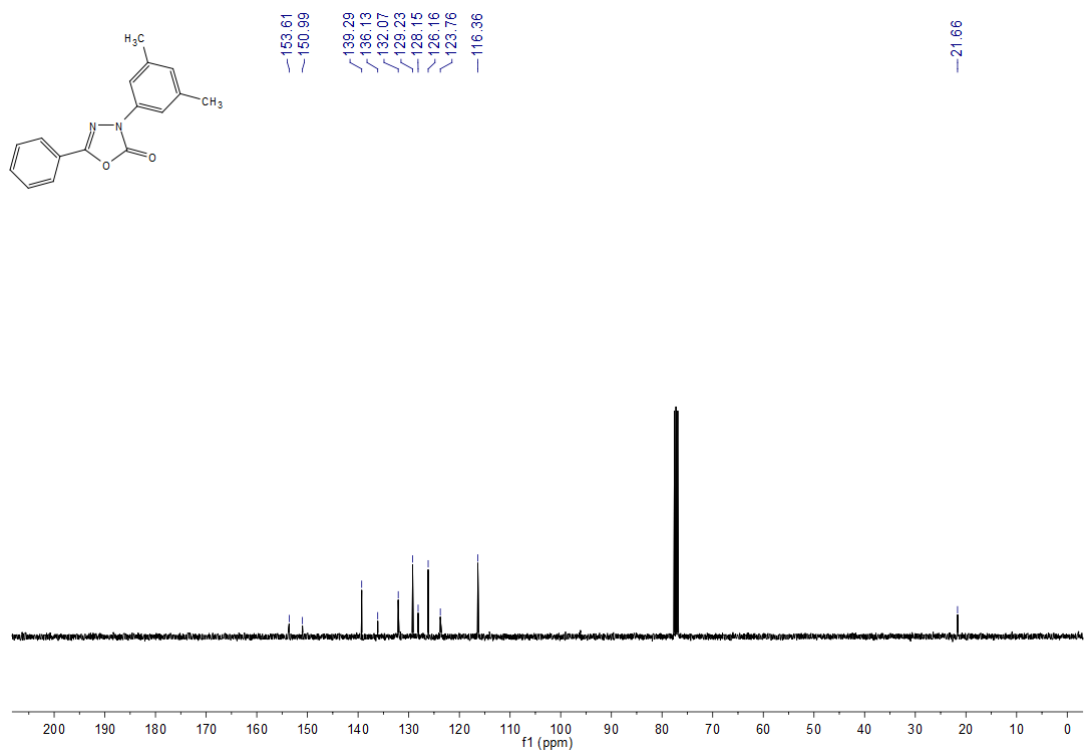

4k

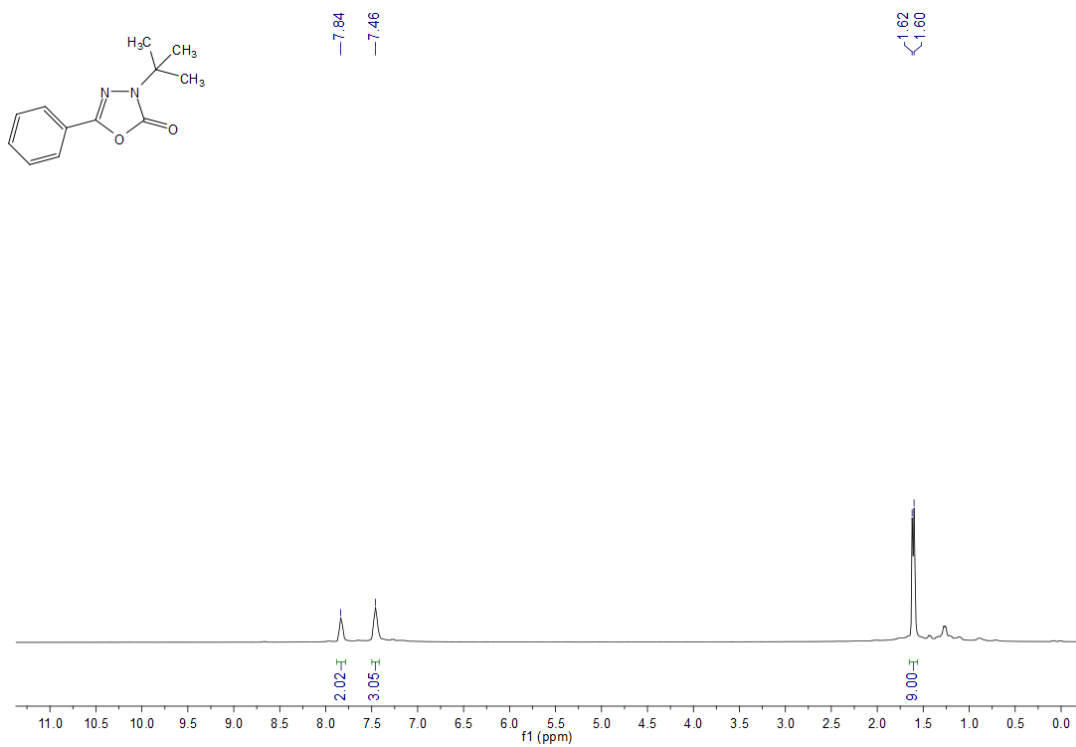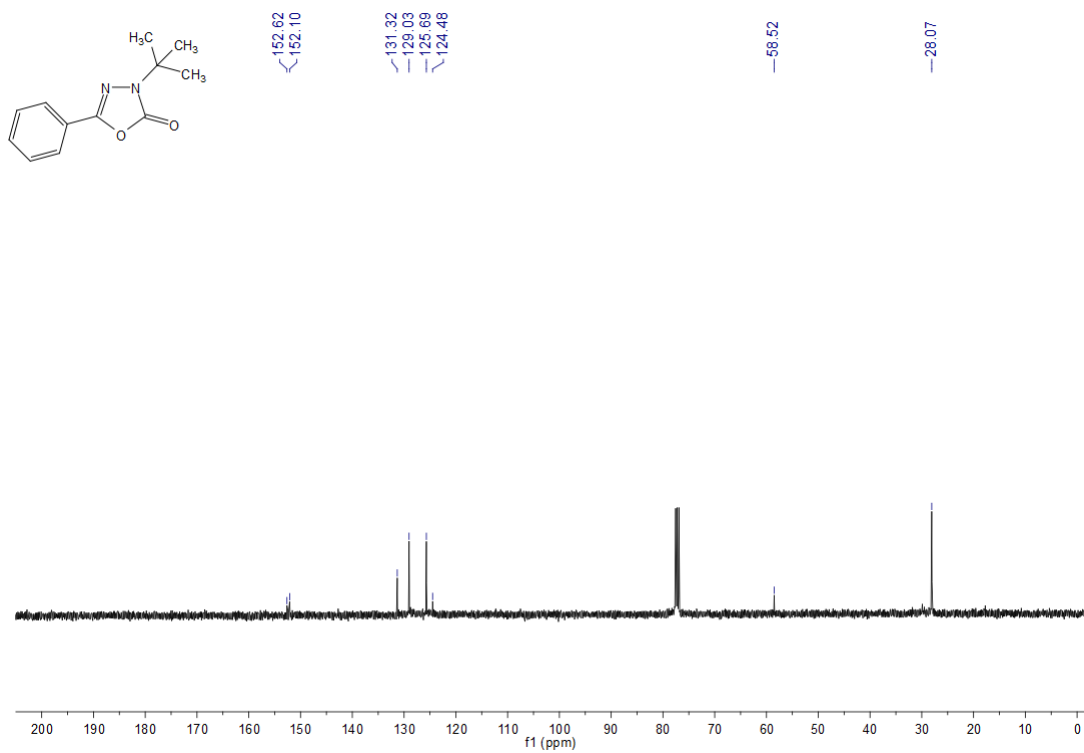

5a

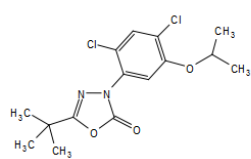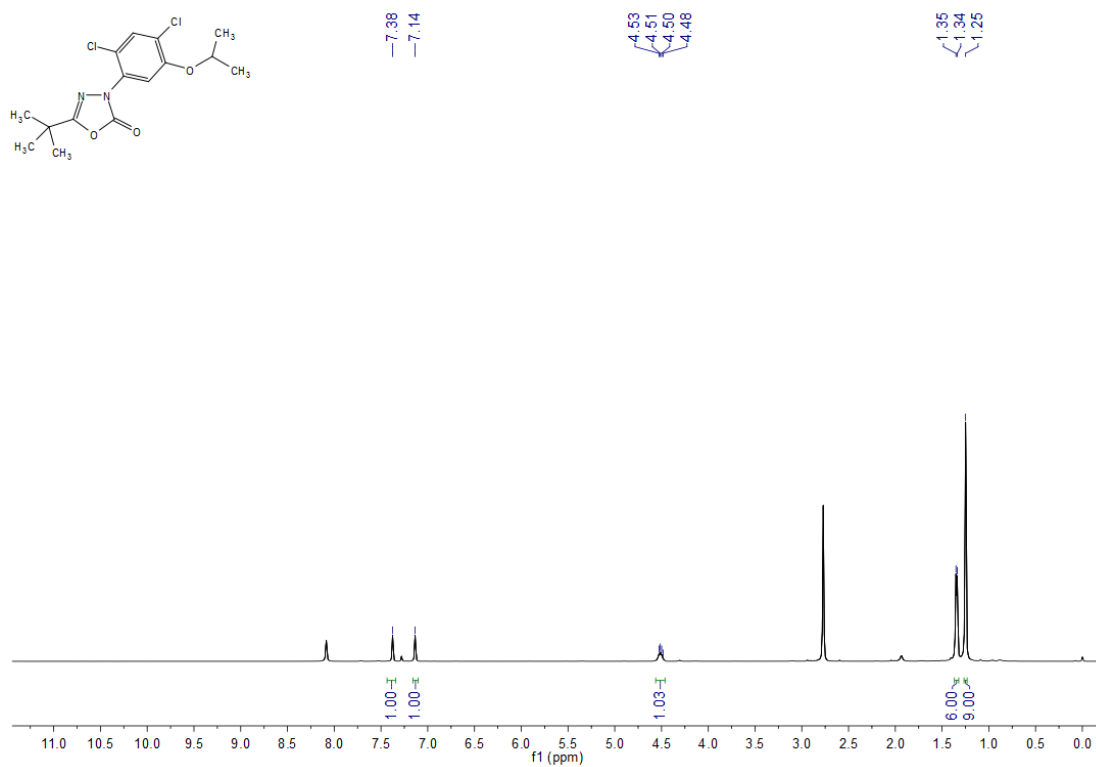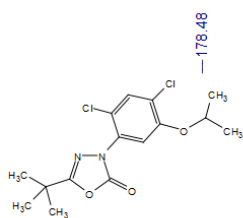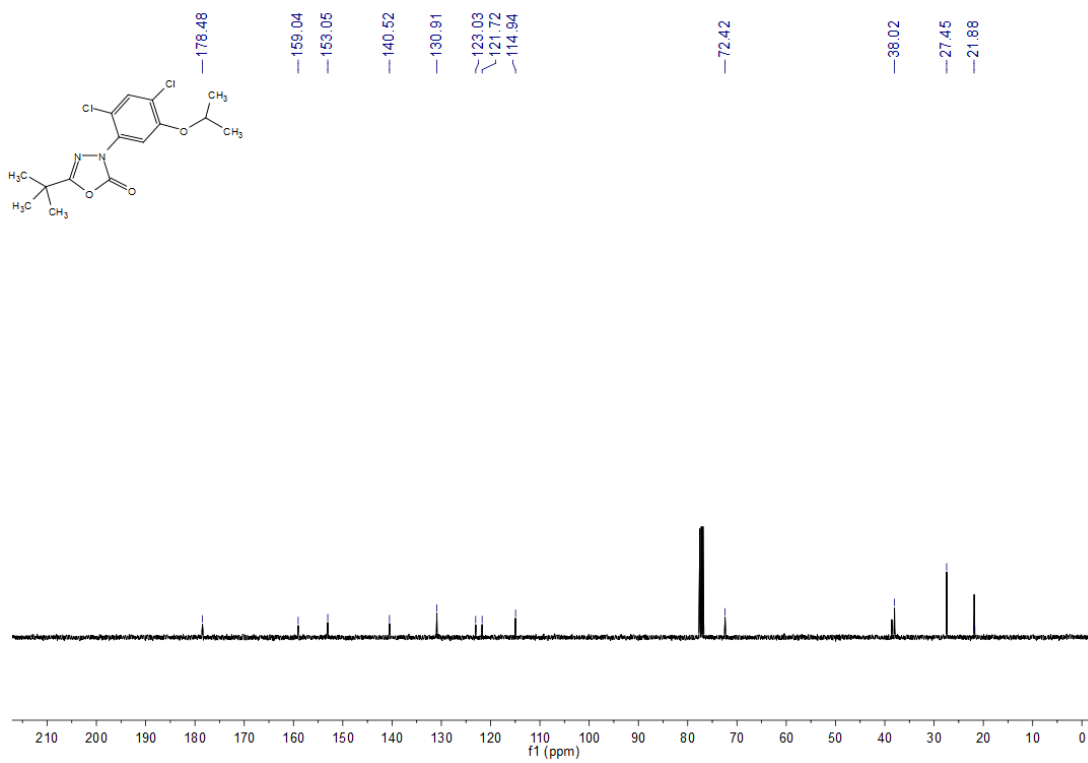

Supplement: c9ob01200a1.pdf [file c9ob01200a1.pdf]
